1

2

3

4           Evaluating the appropriate oral lipid tolerance test model for investigating  
5                                           plasma triglyceride elevation in mice

6

7   Masaru Ochiai\*

8

9   Department of Animal Science, School of Veterinary Medicine, Kitasato University, Towada,

10                   Aomori, Japan

11

12   \* Corresponding author

13   E-mail address: [mochiai@vmas.kitasato-u.ac.jp](mailto:mochiai@vmas.kitasato-u.ac.jp)

## 14 **Abstract**

15 The oral lipid tolerance test (OLTT) has been known to assess intestinal fat metabolism and  
16 whole-body lipid metabolism, but rodent models for OLTT are not yet established. Differences  
17 in OLTT methodology preclude the generation of definitive results, which may cause some  
18 confusion about the anti-hypertriglyceridemia effects of the test materials. To standardize and  
19 generate more appropriate methodology for the OLTT, we examined the effects of mice strain,  
20 dietary lipid sources, fasting period, and gender on lipid-induced hypertriglyceridemia in mice.  
21 First, lipid-induced hypertriglyceridemia was more strongly observed in male ddY mice than in  
22 C57BL/6N or ICR mice. Second, the administration of olive and soybean oils remarkably  
23 repressed lipid-induced hypertriglyceridemia in male ddY mice. Third, fasting period before the  
24 OLTT largely affected the plasma triglyceride elevation. Fasting for 12 h, but less than 48 h,  
25 provoked lipid-induced hypertriglyceridemia in male ddY mice. Fourth, we explored the  
26 suppressive effects of epigallocatechin gallate (EGCG), a green tea polyphenol, on lipid-induced  
27 hypertriglyceridemia. The administration of 100 mg/kg of EGCG suppressed lipid-induced  
28 hypertriglyceridemia and intestinal lipase activity in male ddY mice after 12 h fasting. Fifth,  
29 EGCG-induced suppressive effects were observed after lipid-induced hypertriglyceridemia was  
30 triggered in male mice. Lastly, lipid-induced hypertriglyceridemia could be more effectively  
31 induced in mice fed a high-fat diet for 1 week before the OLTT. These findings indicate that  
32 male ddY mice after 12 h fasting displayed marked lipid-induced hypertriglyceridemia in  
33 response to soybean oil and, hence, may be a more appropriate OLTT model.

34 **Keywords:** oral lipids tolerance test, hypertriglyceridemia, soybean oil, ddY mice, fasting  
35 period, gender, epigallocatechin gallate

## 36 **Introduction**

37       According to 2017 data from the World Health Organization, about 56 million people die per  
38 year worldwide [1]. Cardiovascular diseases have been identified as one of the most common  
39 causes of death globally. Postprandial hyperlipidemia and postprandial hyperglycemia are  
40 independent risk factors for cardiovascular diseases according to epidemiological evidence [2–  
41 9]. Coronary heart disease, type 2 diabetes, insulin resistance, and obesity are all associated with  
42 elevated postprandial plasma triglyceride (TG) levels [10, 11]. Recently, it was also suggested  
43 that a short-term high-fat feeding regimen in mice exacerbated postprandial plasma TG levels  
44 without altering fasting plasma TG levels [12]. Therefore, the improvement of postprandial  
45 hypertriglyceridemia is supposedly a more valuable approach in lowering the risk of  
46 cardiovascular diseases than the improvement of fasting TG levels.

47       Postprandial plasma TG levels are strongly correlated with fasting triglyceride levels.  
48 However, a difference in fasting TG levels only partially accounts for the interindividual  
49 variation in the magnitude of postprandial hyperlipidemia. The postprandial plasma TG response  
50 can be affected by genetic background, diet, physical activity, age, gender, and health conditions  
51 [13, 14]. In general, researchers have focused on fasting plasma TG levels, but not on  
52 postprandial levels in both human and rodent studies because they want to exclude the proximate  
53 effects of food materials on lipid metabolism, since health check programs in humans are often  
54 carried out under fasting conditions.

55       To examine the factors affecting postprandial hypertriglyceridemia and their mechanisms, an  
56 appropriate mice model of hypertriglyceridemia in response to dietary lipids is required.

57 Information about the intestinal digestion and absorption of dietary fats is presented in Fig 1 (Fig  
58 1). The oral lipid tolerance test (OLTT) can assess not only intestinal lipid metabolism but also

59 whole-body lipid metabolism. The ability to quickly normalize hyperlipidemia following the  
60 administration of lipids provides integrated information about intestinal lipid absorption, lipid  
61 transport via lipoproteins, and tissue-specific lipid metabolism. Thus, the OLTT is an essential  
62 and useful method to examine lipid metabolism. Importantly, data from the OLTT can be used to  
63 access information on the pancreas lipase inhibitory activity and intestinal lipid absorption when  
64 investigating the suppressive effects of food materials on postprandial hypertriglyceridemia.  
65 However, rodent models for postprandial hypertriglyceridemia have not yet been standardized.  
66 As shown in Table 1, many researchers have used various models to examine lipid-induced  
67 hypertriglyceridemia; specifically, the mice model, lipid dosage, lipid sources (lipids or lipids  
68 emulsions), and the fasting period before the OLTT often vary among studies, making direct  
69 comparisons difficult [Table 1]. Various experimental protocols cannot generate the determinate  
70 results, which can cause confusion about the pharmaceutical effects of food materials. Fatty  
71 acids and dietary lipid composition and fasting period can largely affect lipid metabolism [15–  
72 17]. For example, when the anti-hypertriglyceridemia effects of diacylglycerol acyltransferase-1  
73 inhibitors were investigated in mice, lipid sources, dosage, and the fasting period before the  
74 OLTT were not uniform [18–20] (Table 1). Furthermore, postprandial hyperglycemia has been  
75 identified as another well-known risk factor for coronary diseases, but its evaluation in mice and  
76 human models has been generally standardized [21], unlike in postprandial hyperlipidemia  
77 testing. In humans, the glucose tolerance test is performed with the individual drinking a 75 g  
78 glucose solution following overnight fasting; in mice, glucose tolerance is assessed through the  
79 oral administration of 2 g/kg glucose following 6 h of fasting [21].

80  
81 **Fig 1. Model of dietary lipid metabolism in small intestine.** Dietary lipids in digestive tract are

82 emulsified and hydrolyzed by pancreas lipase to free fatty acids and monoglycerides. After the  
83 hydrolyzation, lipids are absorbed into small-intestinal epithelial cells, and followed by re-  
84 synthesized to TG. Chylomicrons are formed with synthesized TG and apolipoprotein B-48 and  
85 are transferred to blood via lymph. Some functional materials (e.g. EGCG) inhibit the  
86 emulsification and hydrolyzation of TG in diets, resulting to the suppression of lipids absorption.  
87 On the other hand, some functional materials activate the fatty acids  $\beta$ -oxidation through PPAR $\alpha$   
88 and AMPK activations.

89 **Table 1. List of OLTT models using mice or rats for evaluation of plasma TG levels.**

| Animal |                               |           |        |        | Lipids used for OLTT |                                                |              | Fasting period | Sample                        | Ref. |
|--------|-------------------------------|-----------|--------|--------|----------------------|------------------------------------------------|--------------|----------------|-------------------------------|------|
| Sp.    | Strain                        | Diet      | Gender | Age    | Lipids               | Emulsion                                       | Dose         |                |                               |      |
| M      | C57BL/6J                      | HFD (2 w) | male   | 10 w   | Olive                | -                                              | 0.3 mL/head  | 16 h           | DHA                           | 31   |
| M      | C57BL/6J                      | HFD (1 w) | male   | 8-10 w | Coconut              | -                                              | 0.15 mL/head | 4 h            | -                             | 12   |
| M      | C57BL/6J                      | HFD (1 w) | male   | 10 w   | Olive                | -                                              | 0.3 mL/head  | -              | Bezafibrate                   | 46   |
| M      | C57BL/6J                      | HFD (6 w) | male   | 15 w   | Olive                | -                                              | 10 mL/kg     | 16 h           | Inulin                        | 41   |
| M      | C57BL/6J                      | chow      | male   | 6 w    | Olive                | -                                              | 5 mL/kg      | o.n.           | Oolong tea and green tea      | 47   |
| M      | C57BL/6J                      | HFD (4 w) | male   | 12 w   | Olive                | -                                              | 17 mL/kg     | o.n.           | Pemafibrate                   | 48   |
| M      | ICR                           | chow      | male   | 8 w    | Olive and lard       | -                                              | 5 mL/kg      | 20 h           | Cocoa tea                     | 24   |
| M      | ICR                           | -         | -      | 8 w    | Corn                 | -                                              | 5 mL/kg      | 16 h           | DGAT-1 inhibitor              | 20   |
| M      | ddY                           | -         | male   | 6 w    | Olive                | -                                              | 10 mL/kg     | -              | Aged garlic                   | 49   |
| M      | ICR                           | chow      | male   |        | -                    | 20% soybean oil                                | 10 mL/kg     | 14 h           | AZD7687 (DGAT-1 inhibitor)    | 18   |
| R      | Wistar                        | chow      | male   |        | Corn                 | -                                              | 5 mL/kg      | 14 h           |                               |      |
| M      | C57BL/6J, C57BL/6N, ddY, etc. | chow      | male   | 8 w    | Safflower            | -                                              | 0.4 mL/head  | 24 h           | -                             | 29   |
| M      | C57BL/6, ICR etc.             |           | -      | 5-9 w  | Corn                 | -                                              | 6 mL/kg      | 16 h           | A-922500 (DGAT-1 inhibitor)   | 19   |
| R      | SD, JCR                       |           | -      | 6-9 w  |                      | -                                              |              |                |                               |      |
| R      | SD                            | chow      | male   | 5 w    | Corn                 | -                                              | 5 mL/kg      | o.n.           | Resistant starch              | 50   |
| R      | Wistar                        | chow      | male   | 9 w    | -                    |                                                |              | o.n.           | Black tea polyphenol          | 36   |
| R      | Wistar                        | chow      | male   | 8 w    | -                    | Soybean oil + lecithin + glycerol              | 10 mL/kg     | o.n.           | Green tea catechin            | 37   |
| R      | Wistar                        | chow      | male   | 9 w    | -                    |                                                |              | o.n.           | Green tea catechin            | 23   |
| R      | SD                            | chow      | -      | 8 w    | -                    |                                                |              | 18 h           | Epsilon-polylysine            | 38   |
| R      | SD                            | chow      | -      | 9 w    | -                    | High-oleic safflower oil + lecithin + glycerol | 10 mL/kg     | o.n.           | <i>Lactobacillus pentosus</i> | 39   |
| R      | SD                            | chow      | -      | 5 w    | -                    | 10% soybean oil                                | 15 mL/kg     | o.n.           | Tea leaves                    | 40   |

91 Sp., Species; M, Mice; R, Rat; -, not shown or unclear; o.n., overnight

92

93 The objective of this study was to determine the optimal protocols for the OLTT. We looked  
94 at variables such as mice strains, lipid sources, fasting period, and gender in mice.

95

## 96 **Materials and Methods**

97 The animal experimentation protocol was approved by the President of Kitasato University  
98 through the judgment of the Institutional Animal Care and Use Committee of Kitasato University  
99 (Approval No. 19-194).

100

### 101 **Effect of mice model on lipids-induced hypertriglyceridemia (Exp 1)**

102 I selected mice strains that are commonly used for OLTT studies. Male ICR, ddY, and  
103 C57BL/6N mice were purchased from Japan SLC (Hamamatsu, Japan) at 7 weeks of age. Mice  
104 (n = 10) were housed at  $23 \pm 2^\circ\text{C}$  with lights on between 08:00 and 20:00. Food and water were  
105 accessed *ad libitum* (CE-2; Japan Clea, Tokyo) during a 2-week acclimation period. Mice were  
106 fasted for 12 h before the OLTT. Fasted mice were orally administered soybean oil [5 mL/kg;  
107 FUJIFILM Wako Pure Chemicals Corporation (Wako), Osaka, Japan]. Blood (30  $\mu\text{L}$ /mice) was  
108 then collected from the tail vein and centrifuged ( $6,200\times g$ ,  $4^\circ\text{C}$ , 5 min) to obtain plasma prior to  
109 and at 60, 120, 180, 240, and 360 min after the administration of the oil. Plasma TG levels were  
110 immediately measured using a commercial kit (Wako). The area under the curve (AUC) values  
111 of plasma TG levels were calculated hourly using the trapezoidal rule.

112

### 113 **Effect of lipids species on lipids-induced hypertriglyceridemia in** 114 **mice (Exp 2)**

115 Male ddY mice were obtained from Japan SLC at 6 weeks of age. Mice were acclimated for

116 2 weeks as described above. The ddY mice were fasted for 12 h before the OLTT. Mice were  
117 then divided into five groups (n = 8–10). Different oils were orally administered to each group of  
118 fasted mice. The dietary oils used in this study were olive oil, soybean oil, perilla oil, fish oil,  
119 and beef tallow (Wako). The fatty acid composition [C14:0, C16:0, C18:0, C18:1, C18:2, C18:3,  
120 C20:5 (EPA), and C22:6 (DHA)] of the test oils was determined using a gas chromatography  
121 (GC) system (GC2014, Shimadzu Co. Ltd., Kyoto, Japan) with a 60 m capillary column (TC70,  
122 GL Science Inc., Tokyo) and pure helium carrier gas, as described in the previous study [22].  
123 The injector and detector temperatures of the GC equipment were 250 °C and 260 °C,  
124 respectively; the column oven temperature was constant at 180 °C for 40 minutes and was later  
125 increased by 20 °C/min from 180°C to 260°C. Before GC analysis, the fatty acids from the test  
126 oils were methyl-esterified using a commercial kit (Nacalai Tesque, Inc., Kyoto). The peak  
127 components were identified by comparing each retention time with that of a fatty acid methyl  
128 ester (GLC-211, Funakoshi Co., Tokyo). The sum of the fatty acid percentages was estimated to  
129 be at 100 %. The fatty acid composition of the oils is shown in Fig 2 (Fig 2). Blood collection  
130 and the measurement of plasma TG levels and AUC values were carried out as described above  
131 (Exp 1). After completing Exp 2, mice were maintained on CE-2 for 4 weeks and were later used  
132 for Exp 3.

133

134 **Fig 2. Fatty acids composition of the test oils (Exp 2).**

135

## 136 **Effect of fasting period on lipids-induced hypertriglyceridemia in** 137 **mice (Exp 3)**

138 Male ddY mice used in Exp 2 were used for another OLTT at 10 weeks of age. Mice were



139 divided into five groups (n = 8–10). Before the OLTT, ddY mice were fasted for 0 (non-fasted),  
140 3, 6, 12, and 48 h. Soybean oil (5 mL/kg) was orally administered. Blood collection and the  
141 measurement of plasma TG levels and AUC values were carried out as described above (Exp 1).  
142 After completing Exp 3, mice were maintained on CE-2 for 2 weeks and then used for Exp 4.

143

## 144 **Effect of green tea polyphenol, EGCG on lipids-induced** 145 **hypertriglyceridemia in mice (Exp 4)**

146 EGCG, a main polyphenol compound in green tea (*Camellia sinensis*) leaves, is an  
147 established food-derived pancreas lipase inhibitor known to suppress diet-induced  
148 hypertriglyceridemia in rodents [23, 24]. In Exp 4a, the suppressive effect of EGCG on lipid-  
149 induced hypertriglyceridemia was confirmed under the experimental conditions previously  
150 described in Exps 1–3.

151 The male ddY mice used in Exp 3 were used in Exp 4a at 12 weeks of age. Before the OLTT,  
152 the ddY mice were fasted for 12 h. Mice were divided into two groups (n = 8). Fasted mice were  
153 orally administered soybean oil (5 mL/kg) and water (5 mL/kg) (control group) or soybean oil (5  
154 mL/kg) and 100 mg/kg of EGCG (purity  $\geq 90.0$  %, Wako) (EGCG group). Blood collection and  
155 the measurement of plasma TG levels and AUC values were carried out as described above (Exp  
156 1). After completing the OLTT, the mice were maintained on CE-2 for 1 week before they were  
157 used for biochemical analyses of lipid metabolism in the liver and small intestine (Exp 4b). Here,  
158 male ddY mice, age 13 weeks, were divided into two groups, with five mice per group. The five  
159 mice in each group were selected out of the eight mice on the basis of the lipid-induced elevation  
160 of plasma TG levels at 2 h during Exp 4a. Fasted mice were orally administered soybean oil (5  
161 mL/kg) and water (5 mL/kg) (control group) or soybean oil and EGCG (100 mg/kg) (EGCG

162 group). Two hours after administration, mice were euthanized under isoflurane anesthesia. The  
163 collected blood was centrifuged (6,200 g, 4°C, 15 min) to obtain plasma. The liver and small  
164 intestine were quickly removed and stored at -80°C until analyses were performed. The total  
165 lipids in the liver and the contents of the small intestine were extracted with a mixture of  
166 chloroform and methanol (2:1, v/v), according to the Folch method [25]. The liver TG content  
167 within the crude lipid extract was determined using a commercial kit (Wako). Extracted lipids in  
168 the small intestine were separated on a high-performance thin-layer chromatography plate  
169 (HPTLC; silica gel 60 plates, Merck, Germany) [26]. The plate was developed with a mixture of  
170 hexane/diethyl ether/acetic acid (60:40:1, v/v). The spots of each lipid (particularly TG,  
171 diacylglycerides, monoglycerides, and fatty acids) were visualized using iodine. The activity of  
172 fatty acid synthase (FAS) in the liver was spectrophotometrically determined as described by  
173 Nepokroeff et al. [27]. For the extraction and crude purification of the enzymes, a small part of  
174 the liver was powdered in liquid nitrogen and homogenized in ice-cold Tris-HCL buffer  
175 containing 0.25 mol/L sucrose (pH 7.4). The total cytosol fraction was separated by  
176 centrifugation at  $500 \times g$  for 10 min, followed by  $9,000 \times g$  for 10 min and  $12,000 \times g$  for 120  
177 min. The enzymatic activity was measured at 30 °C and expressed as units per mg of wet tissue  
178 weight.

179

## 180 **Effect of gender on lipids-induced hypertriglyceridemia in mice**

### 181 **(Exp 5)**

182 Male and female ddY mice were similarly acclimated for a week as described above (Exp 1),  
183 and then, it was used for an OLTT at 7 weeks of age. The mice were divided by gender into  
184 groups: eight males and nine females. The mice were fasted for 12 h before the OLTT. Fasted

185 mice were orally administered soybean oil (5 mL/kg) (control group) or soybean oil (5 mL/kg)  
186 with EGCG (100 mg/kg) (EGCG group). Blood collection and the measurement of plasma TG  
187 levels and AUC values were carried out as described above (Exp 1). After the completion of  
188 Exp. 5, the male mice were maintained on CE-2 for 1 week and then used for Exp 6.

189

## 190 **Effect of 1 week-feeding of high-fat and high-sucrose diet on lipids-** 191 **induced hypertriglyceridemia in mice (Exp 6)**

192 Male ddY mice used in Exp 5 were also used for Exp 6 at 8 weeks of age. The mice were fed  
193 with either low fat (LF) AIN-93G diet [7 wt% fat; 10 wt% sucrose] or the AIN-93G-based high-  
194 fat (HF) and high-sucrose diet [30 wt% fat; 20 wt% sucrose; F2HFHSD diet, Oriental Yeast Co.,  
195 Ltd., Tokyo]. After feeding LF or HF diet, the mice in each diet group were divided into two  
196 groups (n = 8–9) for OLTT. The mice were then fasted for 12 h before the OLTT. Fasted mice  
197 were orally administered soybean oil (5 mL/kg) and water (5 mL/kg) (control group) or soybean  
198 oil (5 mL/kg) and EGCG (100 mg/kg) (EGCG group). Blood collection and the measurement of  
199 plasma TG levels and AUC values were carried out as described above (Exp 1).

200

## 201 **Statistical analyses**

202 All statistical analyses were performed using Excel Statistics 2015 (SSRI, Tokyo, Japan). A  
203 difference where  $p < 0.05$  was considered statistically significant. In Exp 1, the data were  
204 expressed as mean  $\pm$  SE (n = 8–10). The statistical analysis of differences among the three mice  
205 strains was performed using a one-way analysis of variance (ANOVA) and Tukey-Kramer test.  
206 In Exp 2, data are expressed as mean  $\pm$  SE (n = 8–10). The statistical analysis of differences  
207 among the five dietary oil groups was performed using a one-way ANOVA and Tukey-Kramer

208 test. In Exp 3, data are expressed as mean  $\pm$  SE (n = 8–10). Statistical analysis of differences  
209 among the five fasting period groups was performed using a one-way ANOVA and Dunnett test,  
210 in which the fasting groups were compared to the non-fasting group. In Exp 4, the data were  
211 expressed as mean  $\pm$  SE (n = 8). The statistical analysis of differences between the two groups  
212 was performed using the Student's t-test. In Exp 5, the data are expressed as mean  $\pm$  SE (n = 8–  
213 9). Statistical analysis of differences among the groups was performed using a two-way ANOVA  
214 (gender and EGCG) and the Tukey-Kramer test. In Exp 6, the data are expressed as mean  $\pm$  SE  
215 (n = 8–9). Statistical analysis of differences among the groups was performed using a two-way  
216 ANOVA (HF diet and EGCG) and the Tukey-Kramer test.

217

## 218 **Results**

### 219 **An increase in lipids-induced hypertriglyceridemia in ddY mice**

#### 220 **(Exp 1)**

221 The fasting plasma TG levels were found to be significantly higher in the ddY mice than in  
222 the other two strains (ICR,  $78 \pm 11$  mg/dL; ddY,  $142 \pm 13$  mg/dL; C57BL/6N,  $60 \pm 3$  mg/dL).  
223 Plasma TG levels during the OLTT were also largely higher in ddY mice than in C57BL/6N and  
224 ICR mice. The AUC values of the plasma TG levels during the OLTT were also higher in the  
225 ddY mice than in C57BL/6N and ICR mice (Fig 3).

226

227 **Fig 3. Effect of mice strain on plasma TG levels and AUC values during the OLTT.** Values  
228 are means  $\pm$  SE (n = 8–10). The data were analyzed with one-way ANOVA, followed by the  
229 post-hoc Tukey-Kramer test. Different letters are significantly different at  $p < 0.05$ .

230

231 **Olive and soybean oils leads to lipids-induced hypertriglyceridemia**  
232 **(Exp 2)**

233 The AUC values of the plasma TG levels during the OLTT were found to be largely higher  
234 in ddY mice that were administered perilla oil, fish oil, and beef tallow than in ddY mice that  
235 were administered olive and soybean oils. The elevation of plasma TG levels at 60 and 120 min  
236 after oil administration was higher in mice administered olive and soybean oils (Fig 4).

237  
238 **Fig 4. Effect of lipid sources on plasma TG levels and AUC values during the OLTT in ddY**  
239 **mice.** Values are means  $\pm$  SE (n = 8–10). The data were analyzed with one-way ANOVA,  
240 followed by the post-hoc Tukey-Kramer test. \*: Asterisks are significantly different at  $p < 0.05$   
241 between the groups as below; \*1, soybean - beef tallow; \*2, soybean, fish - beef tallow; \*3,  
242 perilla, fish, beef tallow - olive; \*4, perilla - soybean; \*5, perilla, fish, beef tallow - olive; \*6,  
243 fish - soybean. Different letters in the AUC values are significantly different at  $p < 0.05$ .

244

245 **A longer, but not too long, fasting leads to lipids-induced**  
246 **hypertriglyceridemia (Exp 3)**

247 The elevation of plasma TG levels at 60 and 120 min after oil administration during the  
248 OLTT was significantly higher in ddY mice, particularly after 12 h fasting. Plasma TG levels at  
249 180 min after oil administration during the OLTT were significantly higher in mice, which were  
250 fasted for 12 h or 48 h. The AUC values of the plasma TG level during the OLTT were higher in  
251 a fasting period-dependent manner (Fig 5).

252

253 **Fig 5. Effect of fasting period on plasma TG levels and AUC values during the OLTT in**

254 **ddY mice.** Values are means  $\pm$  SE (n = 8–10). The data were analyzed with one-way ANOVA,  
255 followed by the post-hoc Dunnett test. \*: asterisks show significant differences ( $p < 0.05$ ) in  
256 compared to 0 h group. (\*): (asterisks) show slight differences ( $p < 0.1$ ) in compared to 0 h  
257 group.

258

## 259 **EGCG suppresses lipids-induced hypertriglyceridemia in 12 h** 260 **fasted ddY mice (Exp 4)**

261 Plasma TG levels and AUC values during the OLTT were significantly lower in ddY mice  
262 that were administered 100 mg/kg EGCG (Fig 6). The HPTLC data showed that spots of TG and  
263 diacylglycerides were clearly observed in the EGCG group, whereas those spots were not  
264 observed in the control group (Fig 7). The plasma TG levels at 120 min after oil administration  
265 were significantly lower in the EGCG group, but the liver TG levels and FAS activity remained  
266 unchanged (Fig 8).

267

### 268 **Fig 6. Effect of EGCG on plasma TG levels and AUC values during the OLTT in ddY mice.**

269 Values are means  $\pm$  SE (n = 8). The data were analyzed with Student-t test. \*: asterisks show  
270 significant differences ( $p < 0.05$ ). (\*): (asterisks) show slight differences ( $p < 0.1$ ).

### 271 **Fig 7. Effect of EGCG on intestinal lipids source following the lipids administration in ddY**

272 **mice.** STD contained a mixture of triolein, diolein, monoolein, and oleic acid. Extracted lipids in  
273 the small intestine were separated on a HPTLC. The plate was developed with hexane/diethyl  
274 ether/acetic acid (60:40:1, v/v). The spots of each lipid were visualized using iodine.

### 275 **Fig 8. Effect of EGCG on plasma and liver TG levels and liver FAS activity in ddY mice.**

276 Values are means  $\pm$  SE (n = 8). The data were analyzed with Student-t test. \*\*: asterisks show

277 significant differences ( $p < 0.01$ ).

278

## 279 **Lipids-induced hypertriglyceridemia is not fully induced in female** 280 **ddY mice (Exp 5)**

281 In male mice, the plasma TG levels and the AUC values observed during the OLTT were  
282 lower in the EGCG group (Fig. 5). Conversely in female mice, the elevation of the plasma TG  
283 levels at 60 min after oil administration was lower in the EGCG group, but the maximal TG  
284 levels after oil administration and the corresponding AUC values were not changed by the  
285 presence of EGCG (Fig 9).

286

287 **Fig 9. Effect of gender on plasma TG levels during the OLTT in ddY mice.** Values are  
288 means  $\pm$  SE (n = 8–9). The data were analyzed with two-way ANOVA, followed by the post-hoc  
289 Tukey-Kramer test.

290

## 291 **A short-term HF diet treatment induced lipids-induced** 292 **hypertriglyceridemia (Exp 6)**

293 The elevation of plasma TG levels after oil administration during the OLTT was significantly  
294 higher in ddY mice treated with HF diet for 1 week prior to testing than those fed with the AIN-  
295 93G control diet. Treatment with EGCG (100 mg/kg) suppressed lipid-induced plasma TG  
296 elevation and AUC values (Fig 10).

297

298 **Fig 10. Effect of short-term HFD on plasma TG levels during the OLTT in ddY mice.**

299 Values are means  $\pm$  SE (n = 8). The data were analyzed with two-way ANOVA, followed by the

300 post-hoc Tukey-Kramer test.

301

## 302 **Discussion**

303 The OLTT has been used to assess whole-body lipid homeostasis. The ability to quickly  
304 normalize hyperlipidemic metabolism following the oral administration of lipids provides  
305 integrated information about intestinal lipid digestion and absorption, lipoprotein transportation,  
306 and tissue-specific lipid metabolism. However, OLTT methodologies are highly varied and are  
307 even different within research groups. Therefore, an appropriate model for the OLTT has not yet  
308 been constructed, whereas the methodology of the OGTT has been generally established in both  
309 mice [21] and humans by the WHO (2013) [28]. The wide array of available lipid sources and  
310 the complexity of lipid metabolism compared to glucose metabolism constitute two reasons for  
311 the variation in OLTT methodologies. This present study has proposed a more appropriate model  
312 of the OLTT for evaluating lipid-induced hypertriglyceridemia in mice by investigating the  
313 differences between mice strains, lipid sources, the fasting period, gender, and diet before OLTT  
314 administration.

315 The first experiment of the present study confirmed that the plasma TG levels after the oral  
316 administration of lipids were different among the tested mice strains. Yamazaki et al. (2012) first  
317 reported that ddY mice were susceptible to lipid-induced hypertriglyceridemia due to an increase  
318 in lipoprotein production and a decrease in whole-body plasma lipoprotein lipase (LPL) activity  
319 [29]. The higher lipoprotein production and lower LPL activity indicate that chylomicron- and  
320 very-low-density-lipoprotein (VLDL)-TG in the plasma cannot be hydrolyzed and transported  
321 into the tissues, which often results in hypertriglyceridemia. Saleh et al. (2011) also suggested in  
322 their review that LPL may be a causative factor for the acceleration of lipid clearance from the



323 blood [30]. However, ddY mice are known to possess higher LPL activities and have the  
324 potential to induce lipid-induced hypertriglyceridemia; however, they are not often selected for  
325 OLTT studies (Table 1). The increases in the plasma TG levels 180 min after oil administration  
326 in the C57BL/6N and ICR mice were 128 and 270 mg/dL, respectively, which were remarkably  
327 lower than in the ddY mice (412 mg/dL). Considering the smaller increase in plasma TG levels  
328 observed in the C57BL/6N and ICR mice, it is likely more difficult to evaluate the suppressive  
329 effects of food materials on hypertriglyceridemia in these strains. Correspondingly, in previous  
330 studies that used C57BL/6 mice strain, the administration of lipids elevated the plasma TG levels  
331 only to about twice the value of the fasting baseline. Yamazaki et al. (2012) reported that the  
332 C57BL/6 mice strain did not show postprandial hypertriglyceridemia [29]. Therefore, we  
333 contend that the choice of mice strain used for the OLTT is an important factor for the evaluation  
334 of lipid-induced hypertriglyceridemia.

335 The lipid source used for the OLTT is considered to be an important factor for lipid-induced  
336 hypertriglyceridemia. In rodent studies, olive and corn oils have often been used as the lipid  
337 source (Table 1). In human studies, various high-fat meals were utilized as the lipid source. The  
338 dominant fatty acids in olive and corn oils are oleic acid (rich in n-9 fatty acids) and linoleic acid  
339 (rich in n-6 fatty acids), respectively, but not n-3 fatty acids (Fig 1). In this study, dietary oils  
340 rich in n-6 and n-9 fatty acids could easily elevate the plasma TG levels. It has been reported that  
341 dietary n-3 fatty acids such as  $\alpha$ -linolenic acid, eicosapentaenoic acid (EPA), and  
342 docosahexaenoic acid (DHA) improved lipid metabolism in rodents and humans through anti-  
343 inflammatory and peroxisome proliferator-activated receptor (PPAR)- $\alpha/\gamma$  activation mechanisms  
344 [31]. The activation of PPAR- $\alpha$  by n-3 fatty acids can increase fatty acid oxidation and decrease  
345 TG and VLDL secretion. Furthermore, the activation of PPAR- $\gamma$  by n-3 fatty acids improves

346 insulin sensitivity, resulting in the increase of TG clearance [15, 16]. The present results indicate  
347 that fish and perilla oils rich in n-3 fatty acids decreased the plasma TG levels and accelerated  
348 TG clearance at 180 min after oil administration, although the maximum plasma TG levels were  
349 not suppressed. These results indicate that n-3 fatty acids accelerated fatty acid oxidation.  
350 Additionally, n-3 fatty acids were identified to be less susceptible to pancreatic lipase activity  
351 due to the presence of multiple double bonds and their overall structural complexity, which may  
352 delay their digestion and absorption [32–35]. In contrast, the administration of beef tallow,  
353 which is rich in saturated fatty acids, unexpectedly suppressed plasma TG elevation. In general,  
354 saturated fats such as those found in beef tallow and lard can easily induce abnormalities in  
355 glucose and fat metabolism, delaying TG clearance. On the other hand, saturated fats are less  
356 susceptible to pancreatic lipase activity, in part due to their higher melting points, resulting in  
357 lower fat absorption. Therefore, these fats can take longer time to be digested and absorbed in  
358 the small intestine, and the plasma TG levels can be suppressed after the administration of  
359 saturated fats. Due to the higher melting points of saturated fats, they are more difficult to orally  
360 administer to rodents with a stainless-steel tube at room temperature. On the other hand,  
361 saturated fats have often been used for the OLTT in human studies. This must be carefully  
362 considered when comparing the results between mice and human studies. This study aimed to  
363 propose an appropriate dietary lipid for OLTT that will increase the plasma TG elevation in  
364 mice, and we determined that soybean oil is the most suitable lipid source for this purpose.  
365 Considering the suppression of the plasma TG elevation and AUC values by n-3 fatty acids, oils  
366 rich in n-3 fatty acids are not likely to be appropriate for OLTT.

367 Dietary lipid size can affect the digestion and absorption of lipids in the small intestine,  
368 which can easily elevate the plasma TG levels. As shown in Table 1, fat emulsions have often

369 been utilized as fat sources when considering the intestinal digestion and absorption of lipids [18,  
370 23, 36-40]. Generally, dietary lipids are emulsified by endogenous bile acids to smaller lipid  
371 droplets in the gut, and then they are digested and absorbed in the small intestine. Administering  
372 the mixture of oils and emulsifiers has been observed to accelerate lipid digestion. Some reports  
373 have shown that the plasma TG levels reached their maximum 2–3 hours after the  
374 administrations of fat emulsions [23, 36–40], which is similar to the timeframe observed in this  
375 study and other reports in which no emulsions were used [24, 29, 41]. Higher maximum values  
376 of plasma TG levels during the OLTT are needed for easier evaluation of hypertriglyceridemia;  
377 hence, different methodologies for lipid preparation should be investigated.

378 The fasting period before the OLTT can greatly affect the resulting plasma TG elevation, but  
379 few investigations examining the effects of fasting period before the OLTT on plasma TG  
380 elevation have been carried out [17, 42]. Ikeda et al. (2014) demonstrated that a longer fasting  
381 period dramatically suppressed mRNA expression associated with lipogenesis but activated  
382 mRNA expression associated with lipid  $\beta$ -oxidation in the liver [17]. The fasting period-  
383 dependent increase in the AUC values of plasma TG levels suggests that the plasma TG levels  
384 did not reach the maximum and that orally administered lipids were effectively absorbed. In the  
385 case of 48 h-fasting period, the maximum plasma TG elevations were found to be delayed,  
386 indicating that the administered lipids were digested and absorbed in the small intestine but were  
387 quickly transported into the liver, before they could enter the blood and be detected in the  
388 plasma. Therefore, fasting treatment for 12 hours before the OLTT is more suitable for the  
389 evaluation of plasma TG elevation as a fasting period that is too long before an OLTT can  
390 greatly affect lipid metabolism; this suggests that a 12 h fasting period is more appropriate than a  
391 48 h fasting period.

392 EGCG is known to have multi-faceted effects [43]. In Japan, EGCG is often utilized as a  
393 functional compound in health foods, supplements, and drinks. The inhibition of pancreatic  
394 lipase activity and the suppression of dietary lipid absorption are considered to be anti-obesity  
395 mechanisms of EGCG [23]. In this study, the administration of EGCG (100 mg/kg) strongly  
396 suppressed the plasma TG elevation during the OLTT, and HPTLC data of small intestinal  
397 contents showed that TG remained in the small intestine and had not been degraded. EGCG  
398 suppressed the elevation of plasma TG to 162, 289, and 186 mg/dL compared to the control  
399 (320, 398, and 308 mg/dL) at 60, 120, and 180 min after administration, respectively. Therefore,  
400 the investigated protocols (ddY, male, 12 h fasting before OLTT, and soybean oil) have been  
401 determined to be appropriate for the evaluation of food-derived compounds in OLTT.  
402 Considering the results from Fig 2 (Exp 1), it is not expected that the C57BL/6N and ICR mice  
403 represent a strong suppressive effect of EGCG on hypertriglyceridemia as observed in the ddY  
404 mice. On the other hand, a single administration of EGCG did not affect TG content and FAS  
405 activity in the liver, unlike in the plasma.

406 Gender has a considerable influence on lipid-induced hypertriglyceridemia. Many reports  
407 have used male mice or rats for evaluating the effects of food materials on lipid-induced  
408 hypertriglyceridemia in OLTT studies (Table 1), although the reasons why male rodents were  
409 exclusively used remain unclear. Some review articles have indicated that male mice are more  
410 susceptible to postprandial hypertriglyceridemia than female mice by some endogenous factors  
411 [30, 44]. Saleh et al. (2011) and Murray et al. (1999) pointed out that acylation-stimulating  
412 protein (ASP), which is produced by adipocytes, accelerated postprandial TG clearance in  
413 women and that a significant association between progesterone and ASP levels contributed to  
414 abdominal fat accumulation in women [30, 44]. In rodents, gender dimorphism was observed in

415 the postprandial response; female mice displayed larger increases in adipose tissue weights and  
416 LPL activities compared to male mice. The rapid clearance of lipids in female mice was  
417 suggested to be caused by LPL activity. Our findings indicate that the maximum plasma TG  
418 levels during OLTT were higher in male mice and EGCG suppressed the levels in male mice  
419 only. Therefore, in the case of OLTT investigations using female mice, the suppressive effects of  
420 food materials on plasma TG elevation may be difficult to be evaluated.

421 Finally, the implementation of high-fat diets for over several weeks exacerbates metabolic  
422 syndrome parameters observed in the plasma and tissues of mice. These diets could not only  
423 exacerbate dysfunctional lipid metabolism, but also exacerbate glucose intolerance and insulin  
424 resistance. On the other hand, a short-term regimen of a high-fat diet (1 week) can induce lipid-  
425 induced hypertriglyceridemia without affecting fasting plasma TG levels [12, 31]. Hernández  
426 Vallejo et al. (2009) suggested that 1-week adaptation to a saturated fat-based high-fat diet could  
427 induce postprandial hypertriglyceridemia, but it could not affect the fasting plasma TG levels, by  
428 inducing intestinal TG synthesis and decreasing chylomicron secretions [12]. In particular, the  
429 serum apo-B48 levels in a fasted state can be a useful marker of postprandial  
430 hypertriglyceridemia [45], which may be another method to associate lipid-induced TG elevation  
431 in the OLTT.

432

## 433 **Conclusions**

434 This study compared TG responses after the oral administration of various dietary lipids in  
435 several strains of fasting mice. These findings helped elucidate more appropriate OLTT models.  
436 We determined that male ddY mice fasted for 12 h displayed markedly higher lipid-induced  
437 hypertriglyceridemia in response to soybean oils rich in n-6 fatty acids. Lipid-induced

438 hypertriglyceridemia and postprandial hyperglycemia are determined to be independent risk  
439 factors for coronary diseases. Determining standard protocols for lipid-induced  
440 hypertriglyceridemia testing is requisite for investigating lipid metabolism in mice.

441

## 442 **Acknowledgements**

443 I thank Ms. Serina Yamashita and Ms. Ao Matsuki (Kitasato University) for technical  
444 assistants in animals care. We thank Enago (<https://www.enago.jp/>) for English language editing.

445

## 446 **References**

- 447 1. World Health Organization. 2018, Global Health Estimates 2016: Deaths by Cause, Age,  
448 Sex, by Country and by Region, 2000–2016. Geneva.
- 449 2. Borén J, Matikainen N, Adiels M, Taskinen MR. Postprandial hypertriglyceridemia as a  
450 coronary risk factor. *Clin. Chim. Acta.* 2014; 431:131–42. doi: 10.1016/j.cca.2014.01.015  
451 PMID: 24508990
- 452 3. Pirillo A, Norata GD, Catapano AL. Postprandial lipemia as a cardiometabolic risk factor.  
453 *Curr. Med. Res. Opin.* 2014; 30(8):1489–503. doi: 10.1185/03007995.2014.909394 PMID:  
454 24673475
- 455 4. Bansal S, Buring JE, Rifai N, Mora S, Sacks FM, Ridker PM. Fasting compared with  
456 nonfasting triglycerides and risk of cardiovascular events in women. *JAMA.* 2007; 298:309–  
457 16. doi: 10.1001/jama.298.3.309 PMID: 17635891
- 458 5. Freiberg JJ, Tybjaerg-Hansen A, Jensen JS, Nordestgaard BG. Nonfasting triglycerides and  
459 risk of ischemic stroke in the general population. *JAMA.* 2008; 300:2142–52. doi:  
460 10.1001/jama.2008.621 PMID: 19001625

- 461 6. Iso H, Naito Y, Sato S, Kitamura A, Okamura T, Sankai T, et al. Serum triglycerides and  
462 risk of coronary heart disease among Japanese men and women. *Am. J. Epidemiol.* 2001;  
463 153:490–9. doi: 10.1093/aje/153.5.490 PMID: 11226981
- 464 7. Boquist S, Ruotolo G, Tang R, Björkegren J, Bond MG, de Faire U, et al. Alimentary  
465 lipemia, postprandial triglyceride-rich lipoproteins, and common carotid intima-media  
466 thickness in healthy, middle-aged men. *Circulation.* 1999; 100:723–8. doi:  
467 10.1161/01.cir.100.7.723 PMID: 10449694
- 468 8. Patsch JR, Miesenböck G, Hopferwieser T, Mühlberger V, Knapp E, Dunn JK, et al.  
469 Relation of triglyceride metabolism and coronary artery disease. *Studies in the postprandial*  
470 *state. Arterioscler. Thromb.* 1992; 12:1336–45. doi: 10.1161/01.atv.12.11.1336 PMID:  
471 1420093
- 472 9. Björkegren J, Boquist S, Samnegård A, Lundman P, Tornvall P, Ericsson CG, et al.  
473 Accumulation of apolipoprotein C–I-rich and cholesterol-rich VLDL remnants during  
474 exaggerated postprandial triglyceridemia in normolipidemic patients with coronary artery  
475 disease. *Circulation.* 2000; 101:227–30. doi: 10.1161/01.cir.101.3.227 PMID: 10645915
- 476 10. Tomlinson B, Chan P, Lam CWK. Postprandial hyperlipidemia as a risk factor in patients  
477 with type 2 diabetes. *Expert Rev. Endocrinol. Metab.* 2020; 15(3):147–57. doi:  
478 10.1080/17446651.2020.1750949 PMID: 32292091
- 479 11. Lairon D, Defoort C. Effects of nutrients on postprandial lipemia. *Curr. Vasc. Pharmacol.*  
480 2011; 9:309–12. doi: 10.2174/157016111795495576 PMID: 21314626
- 481 12. Hernández Vallejo SJ, Alqub M, Luquet S, Cruciani-Guglielmacci C, Delerive P, Lobaccaro  
482 JM, et al. Short-term adaptation of postprandial lipoprotein secretion and intestinal gene

- 483 expression to a high-fat diet. *Am. J. Physiol. Gastrointest. Liver Physiol.* 2009;296(4):  
484 G782–92. doi: 10.1152/ajpgi.90324.2008 PMID: 19196952
- 485 13. Lopez-Miranda J, Williams C, Lairon D. Dietary, physiological, genetic and pathological  
486 influences on postprandial lipid metabolism. *Br. J. Nutr.* 2007; 98:458–73. doi:  
487 10.1017/S000711450774268X PMID: 17705891
- 488 14. Perez-Martinez P, Garcia-Rios A, Delgado-Lista J, Perez-Jimenez F, Lopez-Miranda J.  
489 Nutrigenetics of the postprandial lipoprotein metabolism: evidences from human  
490 intervention studies. *Curr. Vasc. Pharmacol.* 2011. 9(3):287–91. doi:  
491 10.2174/157016111795495495 PMID: 21314629
- 492 15. Schmitz G, Ecker J. The opposing effects of n-3 and n-6 fatty acids. *Prog. Lipid Res.* 2008;  
493 47(2): 147–55. doi: 10.1016/j.plipres.2007.12.004 PMID: 18198131
- 494 16. Calder PC. Mechanisms of action of (n-3) fatty acids. *J. Nutr.* 2012; 142(3):592S–9S. doi:  
495 10.3945/jn.111.155259 PMID: 22279140
- 496 17. Ikeda I, Metoki K, Yamahira T, Kato M, Inoue N, Nagao K, et al. Impact of fasting time on  
497 hepatic lipid metabolism in nutritional animal studies. *Biosci. Biotechnol. Biochem.* 2014;  
498 78(9):1584–91. doi: 10.1080/09168451.2014.923297 PMID: 25209508
- 499 18. Morentin Gutierrez P, Yates J, Nilsson C, Birtles S. Evolving data analysis of an Oral Lipid  
500 Tolerance Test toward the standard for the Oral Glucose Tolerance Test: Cross species  
501 modeling effects of AZD7687 on plasma triacylglycerol. *Pharmacol. Res. Perspect.* 2019;  
502 7(2):e00465. doi: 10.1002/prp2.465 PMID: 30899516
- 503 19. King AJ, Segreti JA, Larson KJ, Souers AJ, Kym PR, Reilly RM, et al. In Vivo Efficacy of  
504 Acyl CoA: Diacylglycerol Acyltransferase (DGAT) 1 Inhibition in Rodent Models of



- 505 Postprandial Hyperlipidemia. *Eur J. Pharmacol.* 2010; 637(1-3):155–61. doi:  
506 10.1016/j.ejphar.2010.03.056 PMID: 20385122
- 507 20. Hong DJ, Jung SH, Kim J, Jung D, Ahn YG, Suh KH, et al. Synthesis and biological  
508 evaluation of novel thienopyrimidine derivatives as diacylglycerol acyltransferase 1  
509 (DGAT-1) inhibitors. *J. Enzyme Inhib. Med. Chem.* 2020; 35(1):227–234. doi:  
510 10.1080/14756366.2019.1693555 PMID: 31752563
- 511 21. Andrikopoulos S, Blair AR, Deluca N, Fam BC, Proietto J. Evaluating the glucose tolerance  
512 test in mice. *Am. J. Physiol. Endocrinol. Metab.* 2008; 295(6):E1323–32. doi:  
513 10.1152/ajpendo.90617.2008 PMID: 18812462
- 514 22. Ochiai M, Inada M, Horiguchi S. Nutritional and safety evaluation of locust (*Caelifera*)  
515 powder as a novel food material. *J. Food Sci.* 2020; 85(2):279–88. doi: 10.1111/1750-  
516 3841.15024 PMID: 31976553
- 517 23. Ikeda I, Tsuda K, Suzuki Y, Kobayashi M, Unno T, Tomoyori H, et al. Tea catechins with a  
518 galloyl moiety suppress postprandial hypertriacylglycerolemia by delaying lymphatic  
519 transport of dietary fat in rats. *J. Nutr.* 2005; 135(2):155–9. doi: 10.1093/jn/135.2.155  
520 PMID: 15671206
- 521 24. Kurihara H, Shibata H, Fukui Y, Kiso Y, Xu JK, Yao XS, et al. Evaluation of the  
522 hypolipemic property of *Camellia sinensis* Var. *ptilophylla* on postprandial  
523 hypertriglyceridemia. *J. Agric. Food Chem.* 2006; 12; 54(14):4977–81. doi:  
524 10.1021/jf0603681 PMID: 16819905
- 525 25. Folch J, Lees M, Sloane Stanley GH. A simple method for the isolation and purification of  
526 total lipides from animal tissues. *J. Biol. Chem.* 1957; 226(1):497–509. PMID: 13428781

- 527 26. Yoshizumi K, Murota K, Watanabe S, Tomi H, Tsuji T, Terao J. Chiisanoside is not  
528 absorbed but inhibits oil absorption in the small intestine of rodents. *Biosci Biotechnol*  
529 *Biochem.* 2008; 72(4):1126–9. doi: 10.1271/bbb.70761 PMID: 18391464
- 530 27. Nepokroeff CM, Lakshmanan MR, Porter JW. Fatty-acid synthase from rat liver. *Methods*  
531 *Enzymol.* 1975; 35:37–44. doi: 10.1016/0076-6879(75)35136-7 PMID: 1121291
- 532 28. World Health Organization. 2013, Diagnostic criteria and classification of hyperglycaemia  
533 first detected in pregnancy (WHO/NMH/MND/13.2)
- 534 29. Yamazaki T, Kishimoto K, Ezaki O. The ddY mouse: a model of postprandial  
535 hypertriglyceridemia in response to dietary fat. *J. Lipid Res.* 2012; 53(10):2024–37. doi:  
536 10.1194/jlr.M023713 PMID: 22735545
- 537 30. Saleh J, Al-Wardy N, Farhan H, Al-Khanbashi M, Cianflone K. Acylation stimulating  
538 protein: a female lipogenic factor? *Obes. Rev.* 2011; 12(6):440–8. doi: 10.1111/j.1467-  
539 789X.2010.00832.x PMID: 21348923
- 540 31. Kimura R, Takahashi N, Lin S, Goto T, Murota K, Nakata R, et al. DHA attenuates  
541 postprandial hyperlipidemia via activating PPAR $\alpha$  in intestinal epithelial cells. *J. Lipid Res.*  
542 2013; 54(12):3258–68. doi: 10.1194/jlr.M034942 PMID: 24133194
- 543 32. Akanbi TO, Sinclair AJ, Barrow CJ. Pancreatic lipase selectively hydrolyses DPA over EPA  
544 and DHA due to location of double bonds in the fatty acid rather than regioselectivity. *Food*  
545 *Chem.* 2014; 160:61–6. doi: 10.1016/j.foodchem.2014.03.092 PMID: 24799209
- 546 33. Zhu X, Ye A, Verrier T, Singh H. Free fatty acid profiles of emulsified lipids during in vitro  
547 digestion with pancreatic lipase. *Food Chem.* 2013; 139(1-4):398–404. doi:  
548 10.1016/j.foodchem.2012.12.060 PMID: 23561123

- 549 34. Ye Z, Li R, Cao C, Xu YJ, Cao P, Li Q, et al. Fatty acid profiles of typical dietary lipids  
550 after gastrointestinal digestion and absorption: A combination study between in-vitro and in-  
551 vivo. *Food Chem.* 2019; 280:34–44. doi: 10.1016/j.foodchem.2018.12.032 PMID: 30642504
- 552 35. Ye Z, Cao C, Li R, Cao P, Li Q, Liu Y. Lipid composition modulates the intestine digestion  
553 rate and serum lipid status of different edible oils: a combination of in vitro and in vivo  
554 studies. *Food Funct.* 2019; 10(3):1490–503. doi: 10.1039/c8fo01290c PMID: 30783644
- 555 36. Kobayashi M, Ichitani M, Suzuki Y, Unno T, Sugawara T, Yamahira T, et al. Black-tea  
556 polyphenols suppress postprandial hypertriacylglycerolemia by suppressing lymphatic  
557 transport of dietary fat in rats. *J. Agric. Food Chem.* 2009; 57(15):7131–6. doi:  
558 10.1021/jf900855v PMID: 19722586
- 559 37. Suzuki Y, Unno T, Kobayashi M, Nozawa A, Sagesaka Y, Kakuda T. Dose-dependent  
560 suppression of tea catechins with a galloyl moiety on postprandial hypertriglyceridemia in  
561 rats. *Biosci Biotechnol Biochem.* 2005; 69(7):1288–91. doi: 10.1271/bbb.69.1288 PMID:  
562 16041132
- 563 38. Kido Y, Hiramoto S, Murao M, Horio Y, Miyazaki T, Kodama T, et al. Epsilon-polylysine  
564 inhibits pancreatic lipase activity and suppresses postprandial hypertriacylglyceridemia in  
565 rats. *J. Nutr.* 2003; 133(6):1887–91. doi: 10.1093/jn/133.6.1887 PMID: 12771334
- 566 39. Zhou Y, Inoue N, Ozawa R, Maekawa T, Izumo T, Kitagawa Y, et al. Effects of heat-killed  
567 *Lactobacillus pentosus* S-PT84 on postprandial hypertriacylglycerolemia in rats. *Biosci.*  
568 *Biotechnol. Biochem.* 2013; 77(3):591–4. doi: 10.1271/bbb.120830 PMID: 23470742
- 569 40. Tamaru S, Ohmachi K, Miyata Y, Tanaka T, Kubayasi T, Nagata Y, et al.  
570 Hypotriglyceridemic potential of fermented mixed tea made with third-crop green tea leaves

- 571 and camellia (*Camellia japonica*) leaves in Sprague-Dawley rats. *J. Agric. Food Chem.*  
572 2013; 61(24):5817–23. doi: 10.1021/jf400938h PMID: 23705670
- 573 41. Hiel S, Neyrinck AM, Rodriguez J, Pachikian BD, Bouzin C, Thissen JP, et al. Inulin  
574 Improves Postprandial Hypertriglyceridemia by Modulating Gene Expression in the Small  
575 Intestine. *Nutrients*. 2018; 10(5):532. doi: 10.3390/nu10050532 PMID: 29693598
- 576 42. Palou M, Priego T, Sánchez J, Villegas E, Rodríguez AM, Palou A, et al. Sequential changes  
577 in the expression of genes involved in lipid metabolism in adipose tissue and liver in  
578 response to fasting. *Pflugers Arch*. 2008; 456(5):825–36. doi: 10.1007/s00424-008-0461-1  
579 PMID: 18493788
- 580 43. Ikeda I. Multifunctional effects of green tea catechins on prevention of the metabolic  
581 syndrome. *Asia Pac. J. Clin. Nutr*. 2008; 17(Suppl 1):273–4. PMID: 18296354
- 582 44. Murray I, Sniderman AD, Cianflone K. Mice lacking acylation stimulating protein (ASP)  
583 have delayed postprandial triglyceride clearance. *J. Lipid Res*. 1999; 40(9):1671–6. PMID:  
584 10484614
- 585 45. Masuda D, Sakai N, Sugimoto T, Kitazume-Taneike R, Yamashita T, Kawase R, et al.  
586 Fasting serum apolipoprotein B-48 can be a marker of postprandial hyperlipidemia. *J.*  
587 *Atheroscler. Thromb*. 2011; 18(12):1062–70. doi: 10.5551/jat.10470 PMID: 21946533
- 588 46. Kimura R, Takahashi N, Murota K, Yamada Y, Niiya S, Kanzaki N, et al. Activation of  
589 peroxisome proliferator-activated receptor- $\alpha$  (PPAR $\alpha$ ) suppresses postprandial lipidemia  
590 through fatty acid oxidation in enterocytes. *Biochem. Biophys. Res. Commun*. 2011;  
591 410(1):1–6. doi: 10.1016/j.bbrc.2011.05.057 PMID: 21640707

- 592 47. Toyoda-Ono Y, Yoshimura M, Nakai M, Fukui Y, Asami S, Shibata H, et al. Suppression of  
593 postprandial hypertriglyceridemia in rats and mice by oolong tea polymerized polyphenols.  
594 Biosci. Biotechnol. Biochem. 2007; 71(4):971–6. doi: 10.1271/bbb.60635 PMID: 17420597
- 595 48. Sairyō M, Kobayashi T, Masuda D, Kanno K, Zhu Y, Okada T, et al. A Novel Selective  
596 PPAR $\alpha$  Modulator (SPPARM $\alpha$ ), K-877 (Pemafibrate), Attenuates Postprandial  
597 Hypertriglyceridemia in Mice. *J. Atheroscler. Thromb.* 2018; 25(2):142–52. doi:  
598 10.5551/jat.39693 PMID: 28781340
- 599 49. Maeda T, Miki S, Morihara N, Kagawa Y. Aged garlic extract ameliorates fatty liver and  
600 insulin resistance and improves the gut microbiota profile in a mouse model of insulin  
601 resistance. *Exp. Ther. Med.* 2019; 18(1):857–66. doi: 10.3892/etm.2019.7636 PMID:  
602 31281460
- 603 50. Matsuda H, Kumazaki K, Otokozawa R, Tanaka M, Udagawa E, Shirai T. Resistant starch  
604 suppresses postprandial hypertriglyceridemia in rats. *Food Res. Int.* 2016; 89(Pt 1):838–42.  
605 doi: 10.1016/j.foodres.2016.10.022 PMID: 28460986

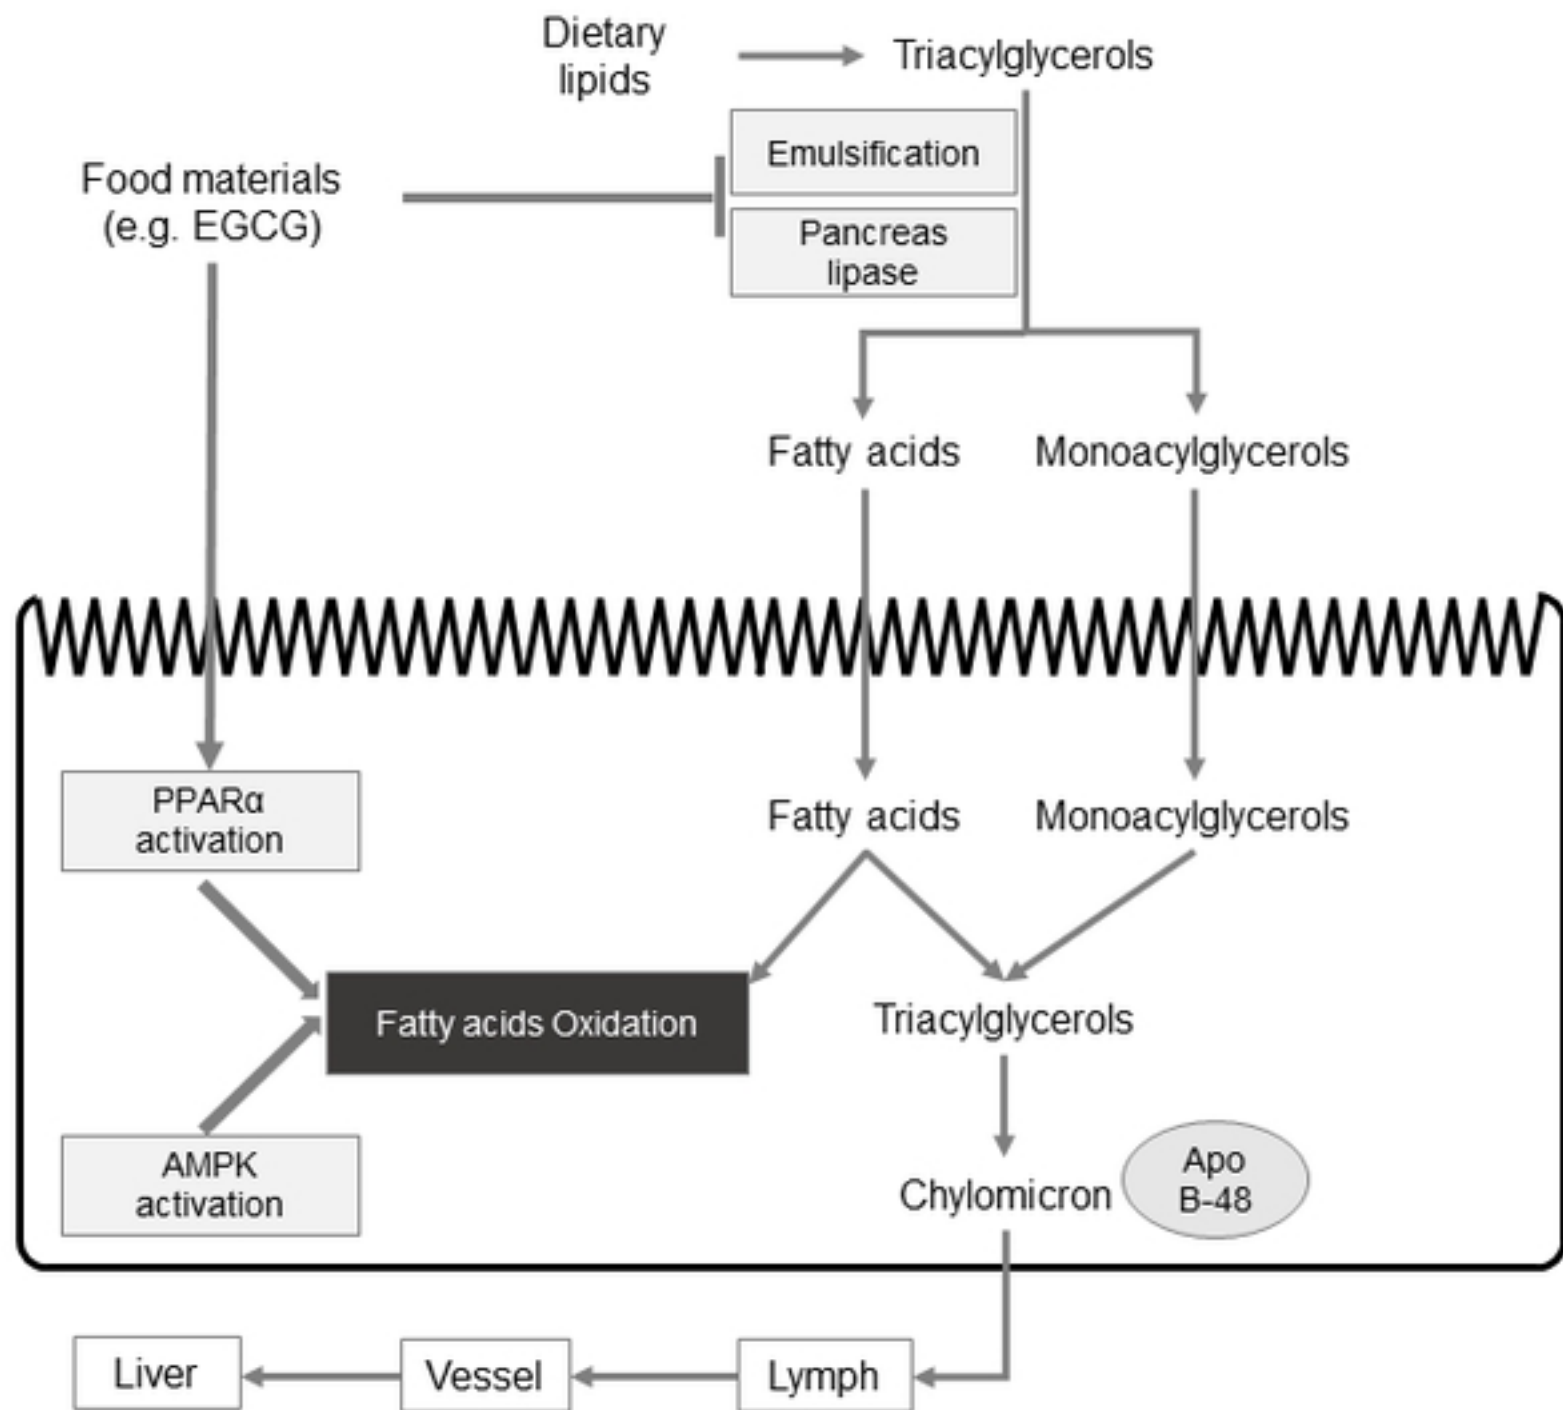

Figure 1

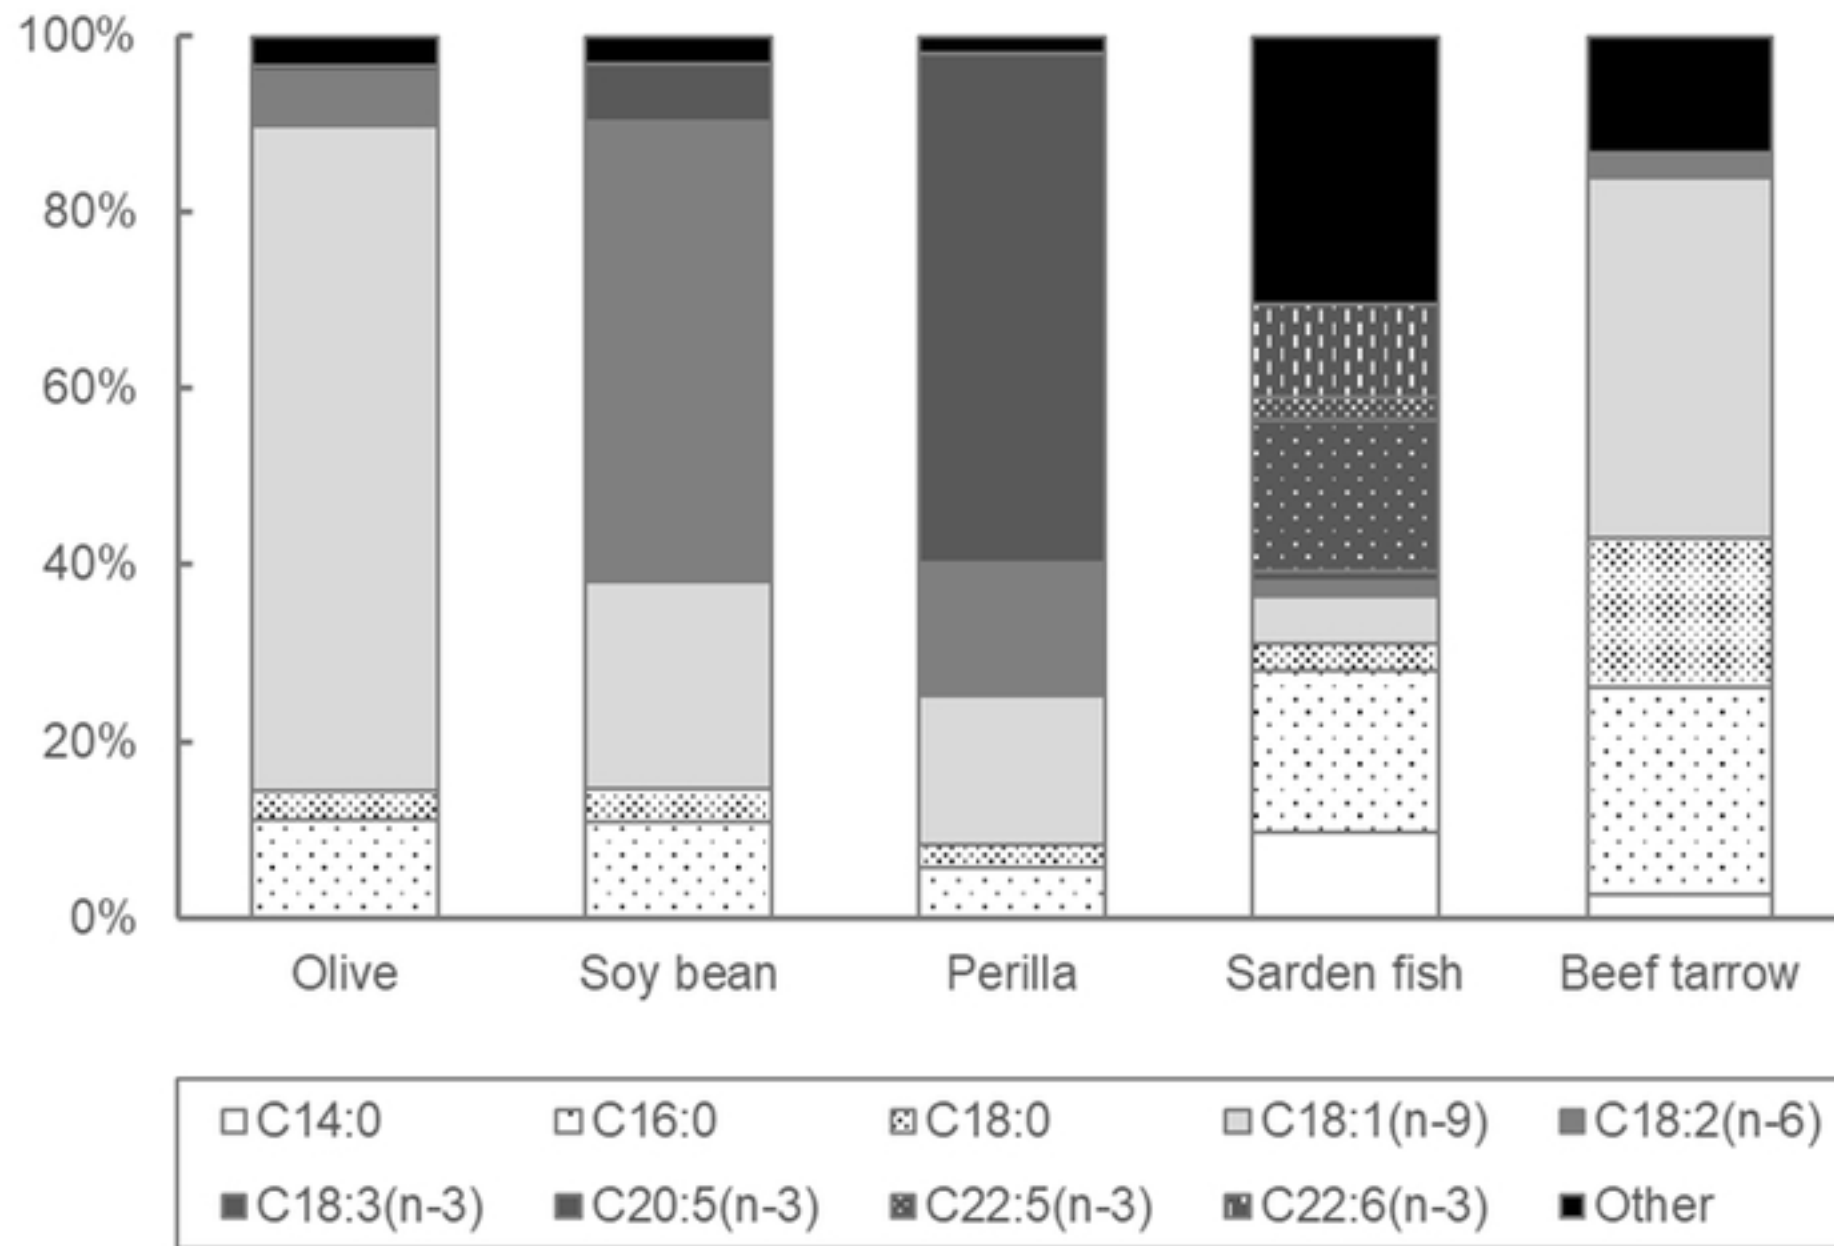

Figure 2

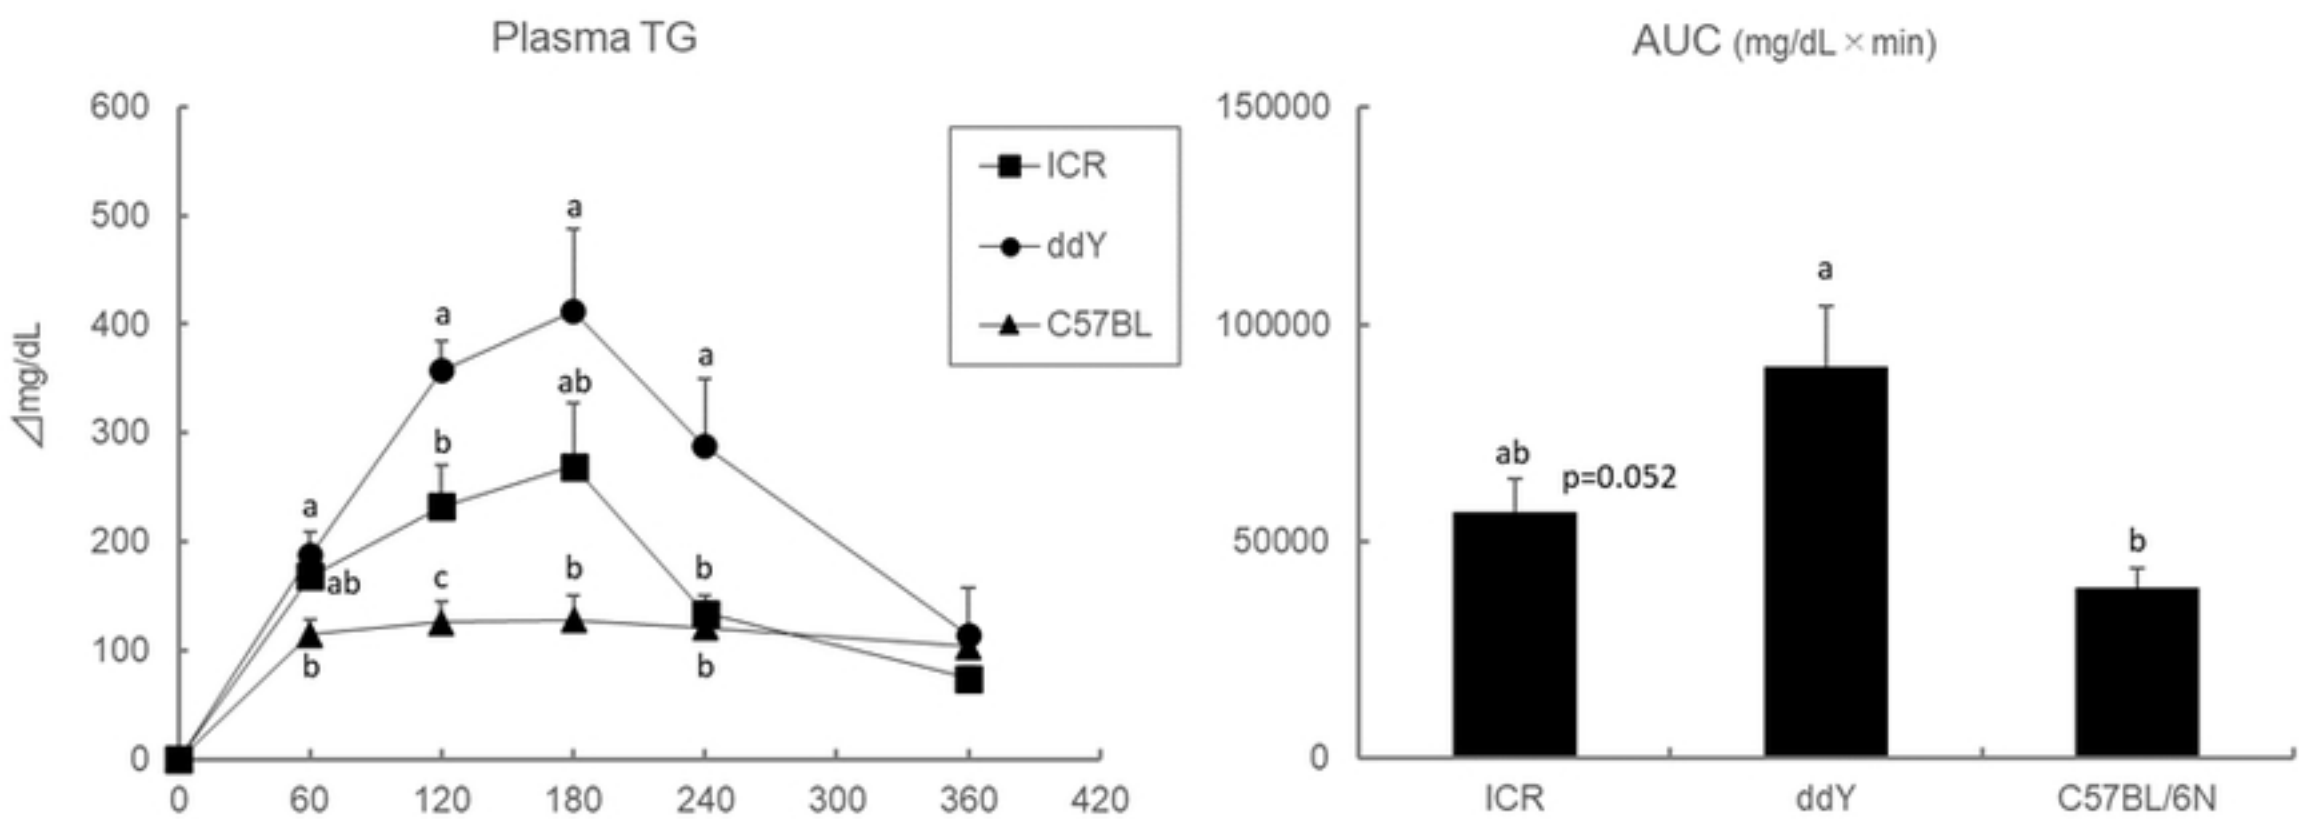

Figure 3



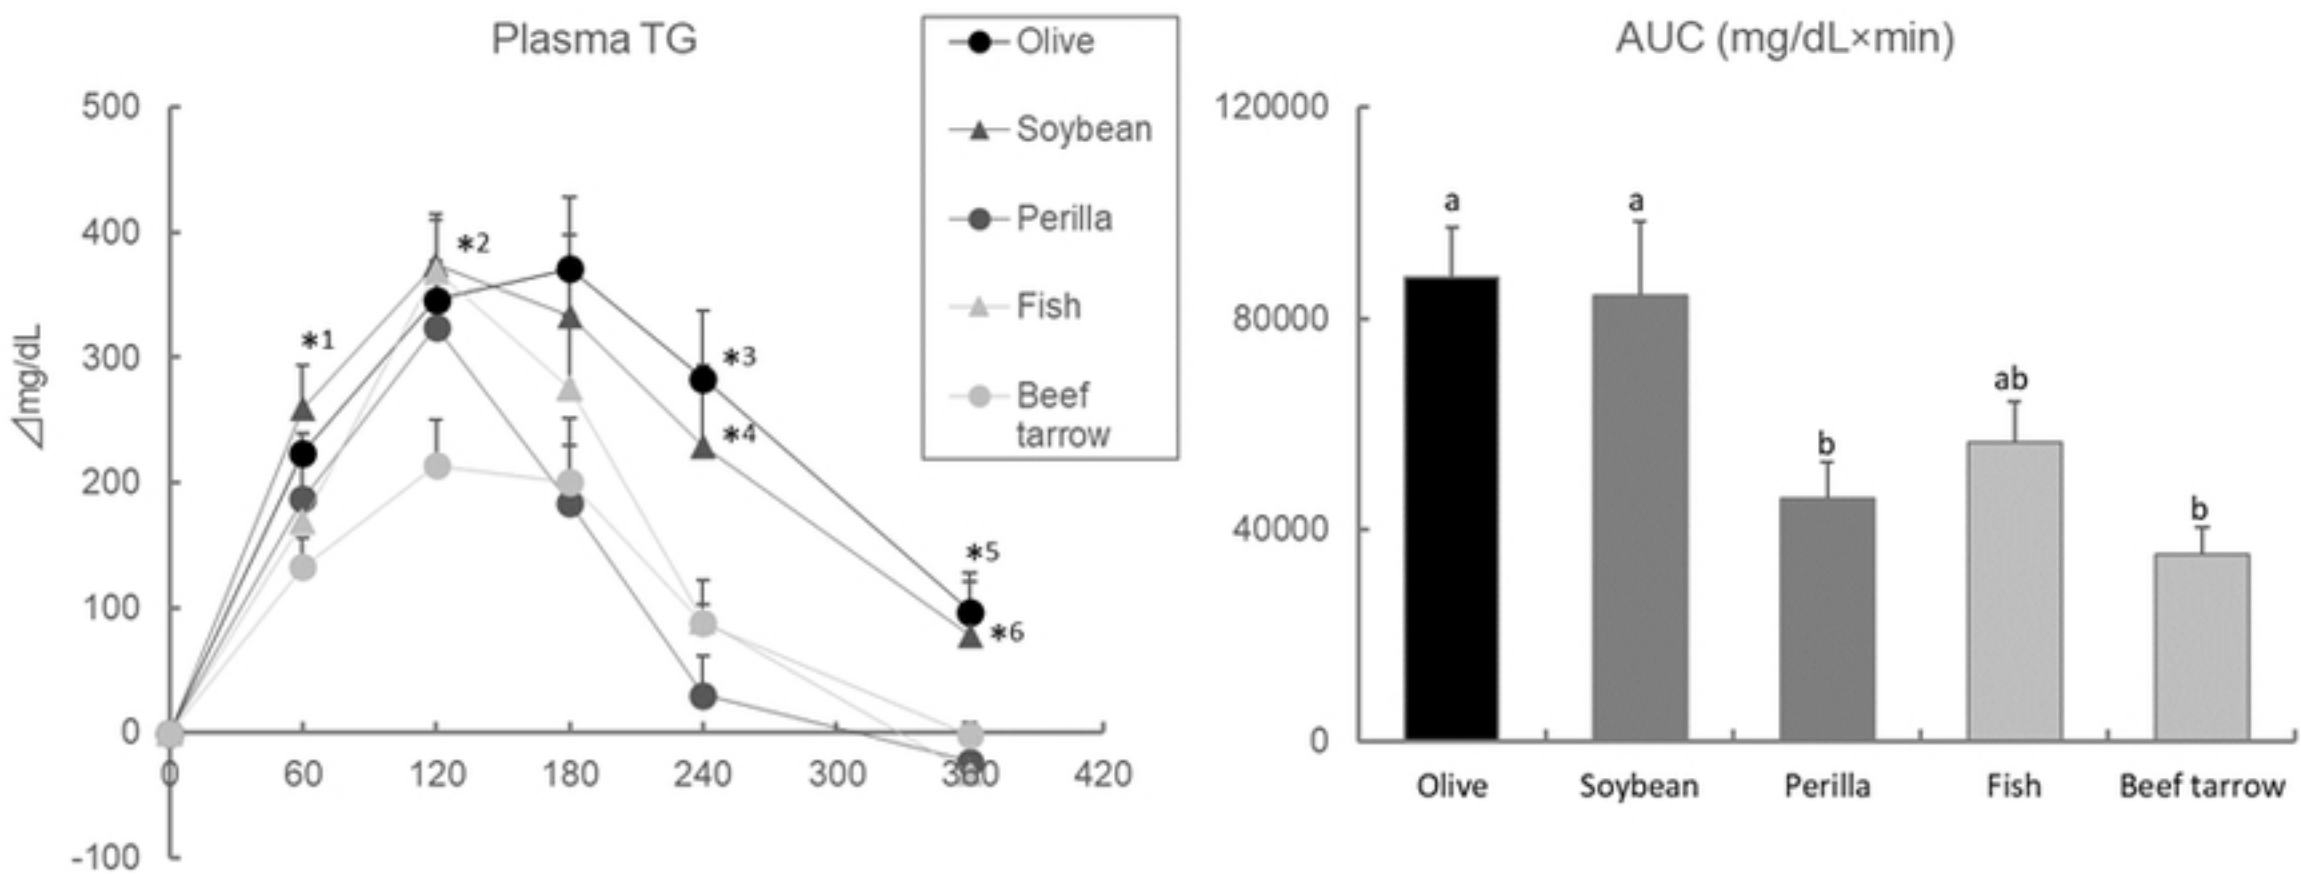

Figure 4

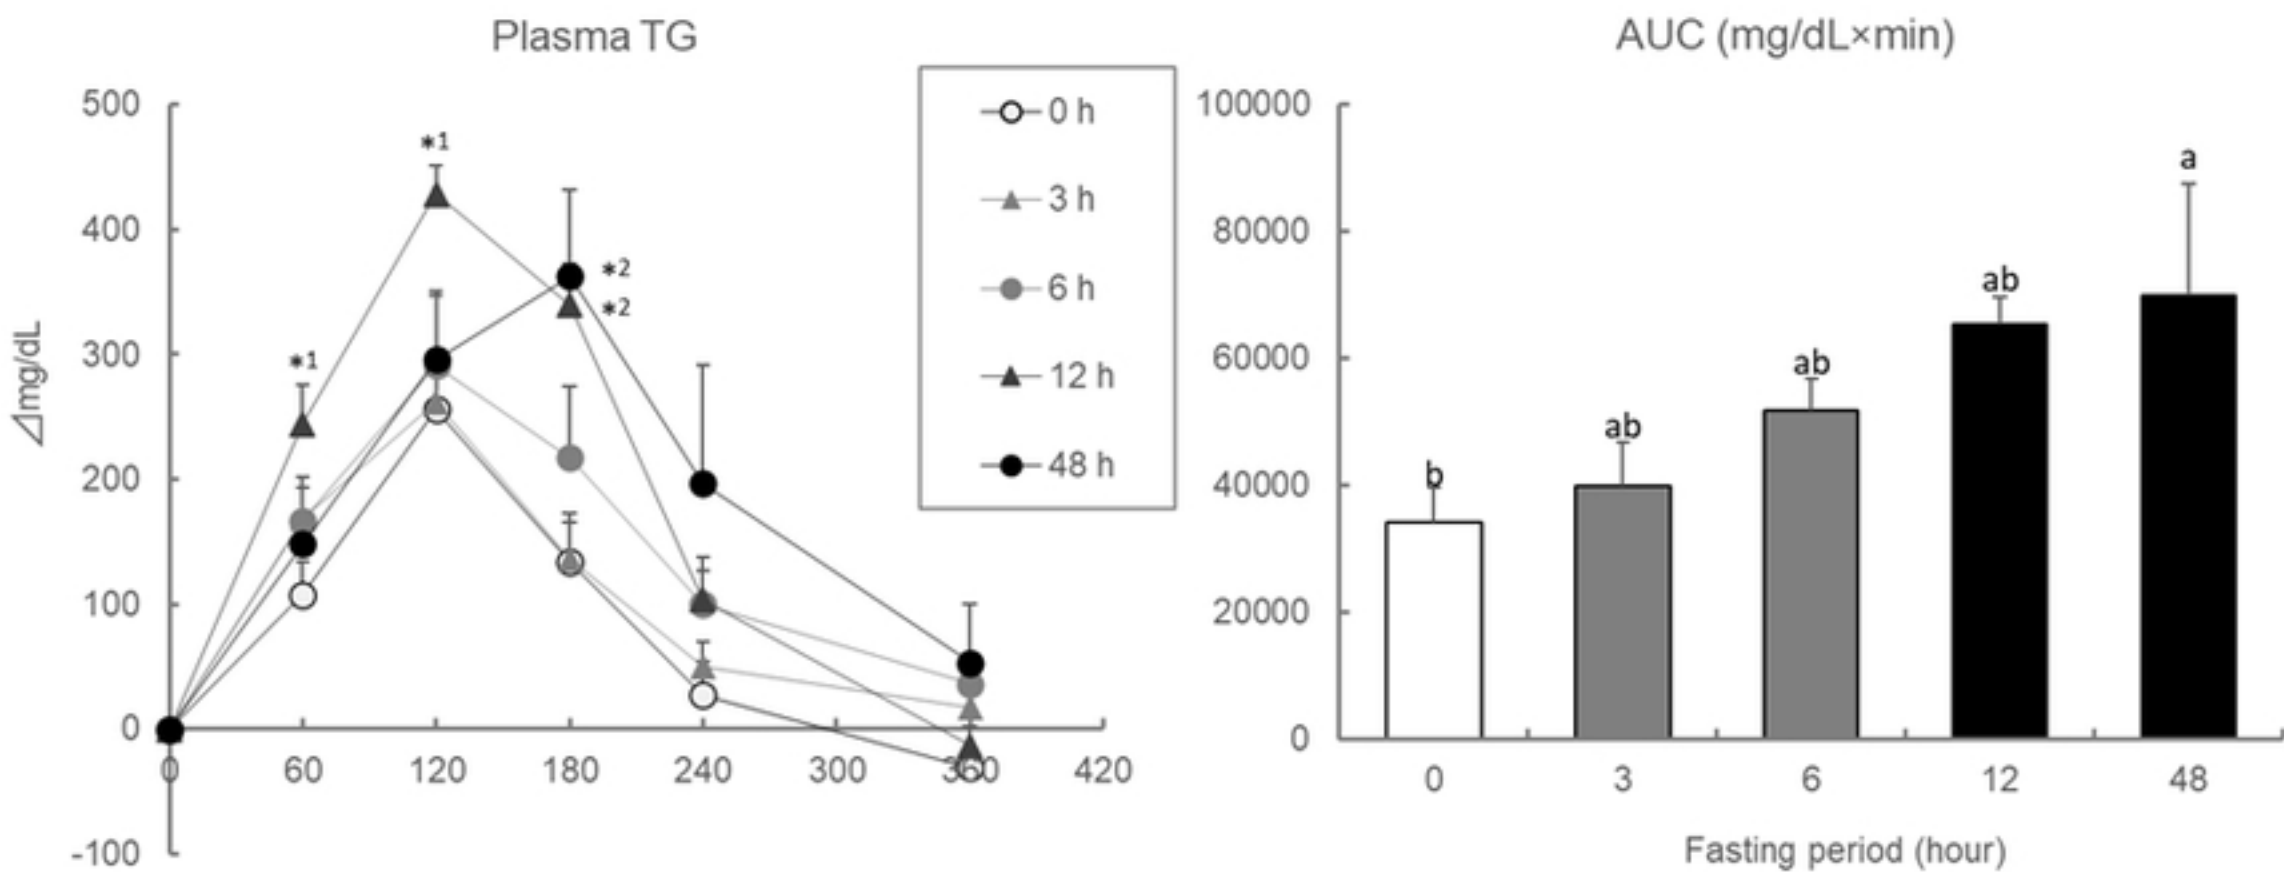

Figure 5

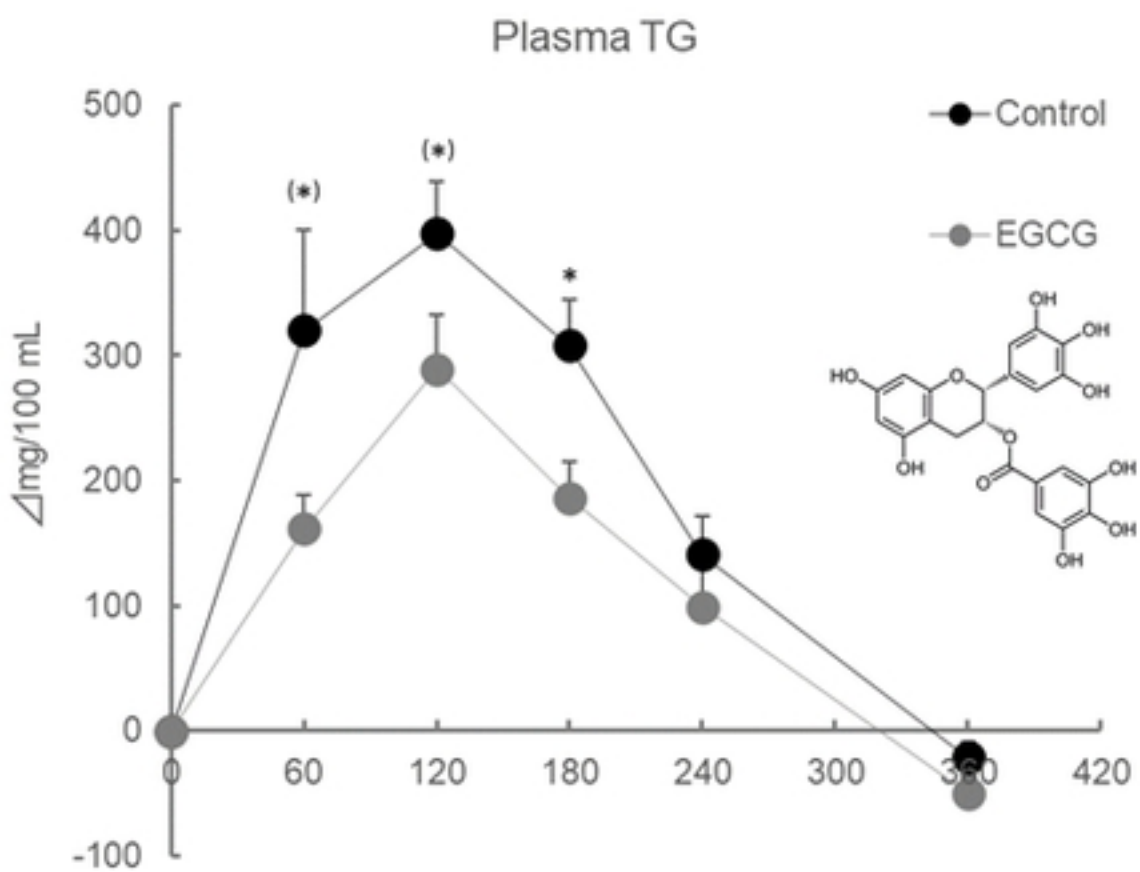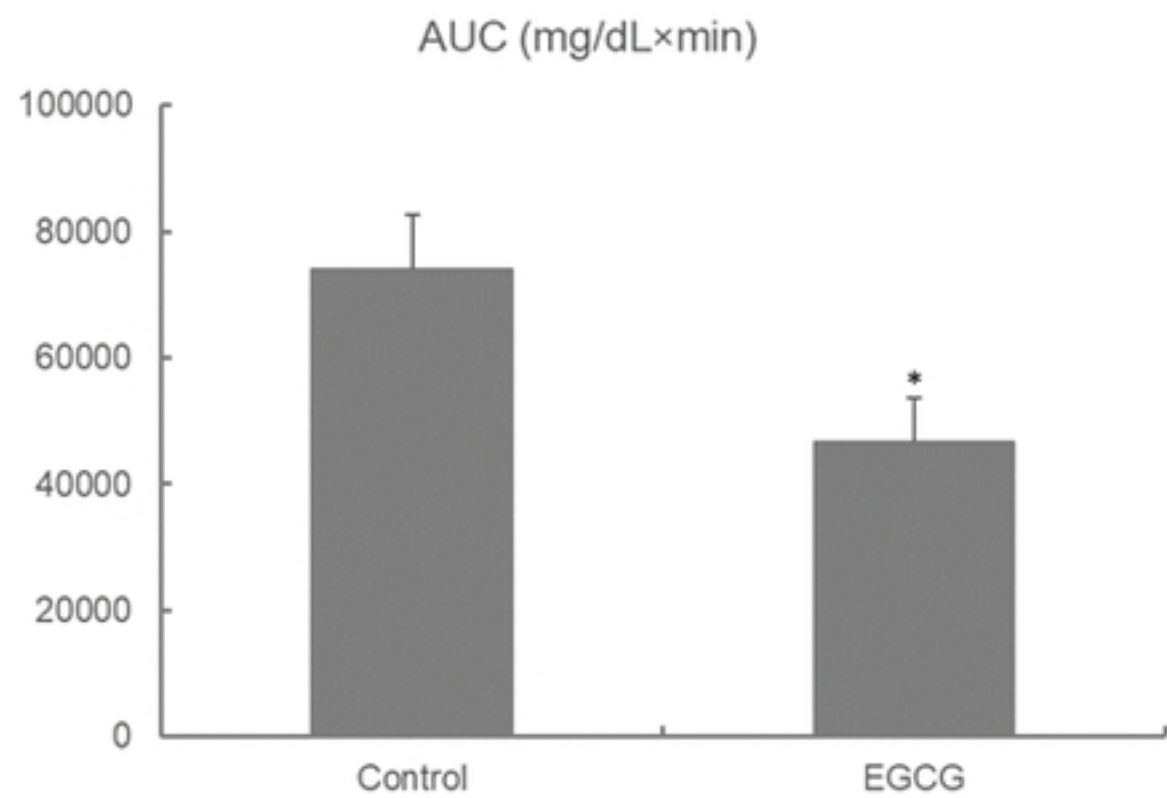

Figure 6

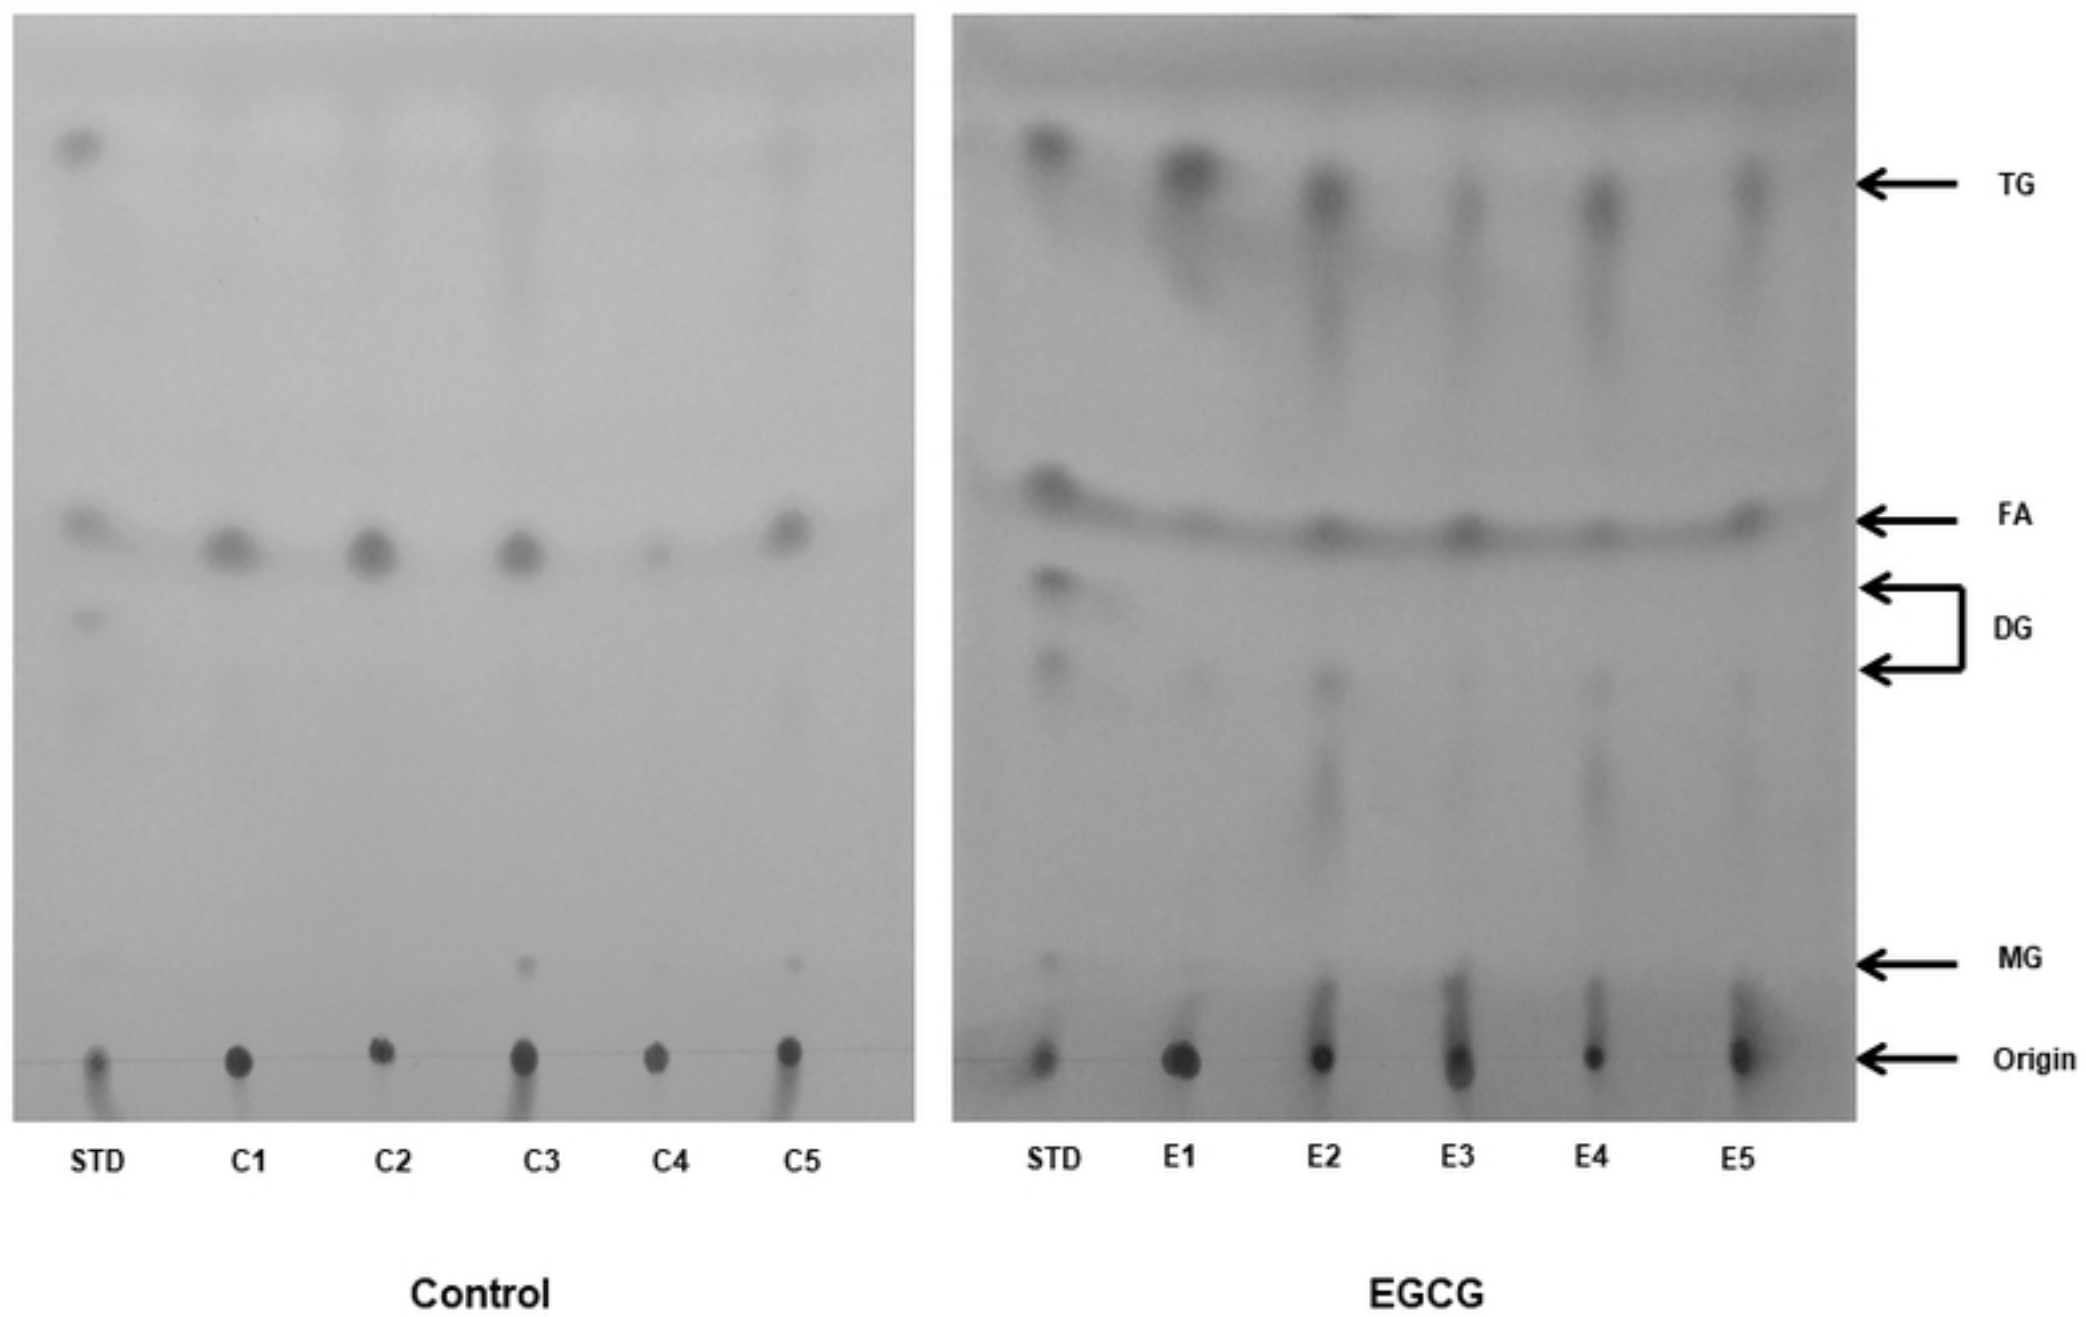

Figure 7

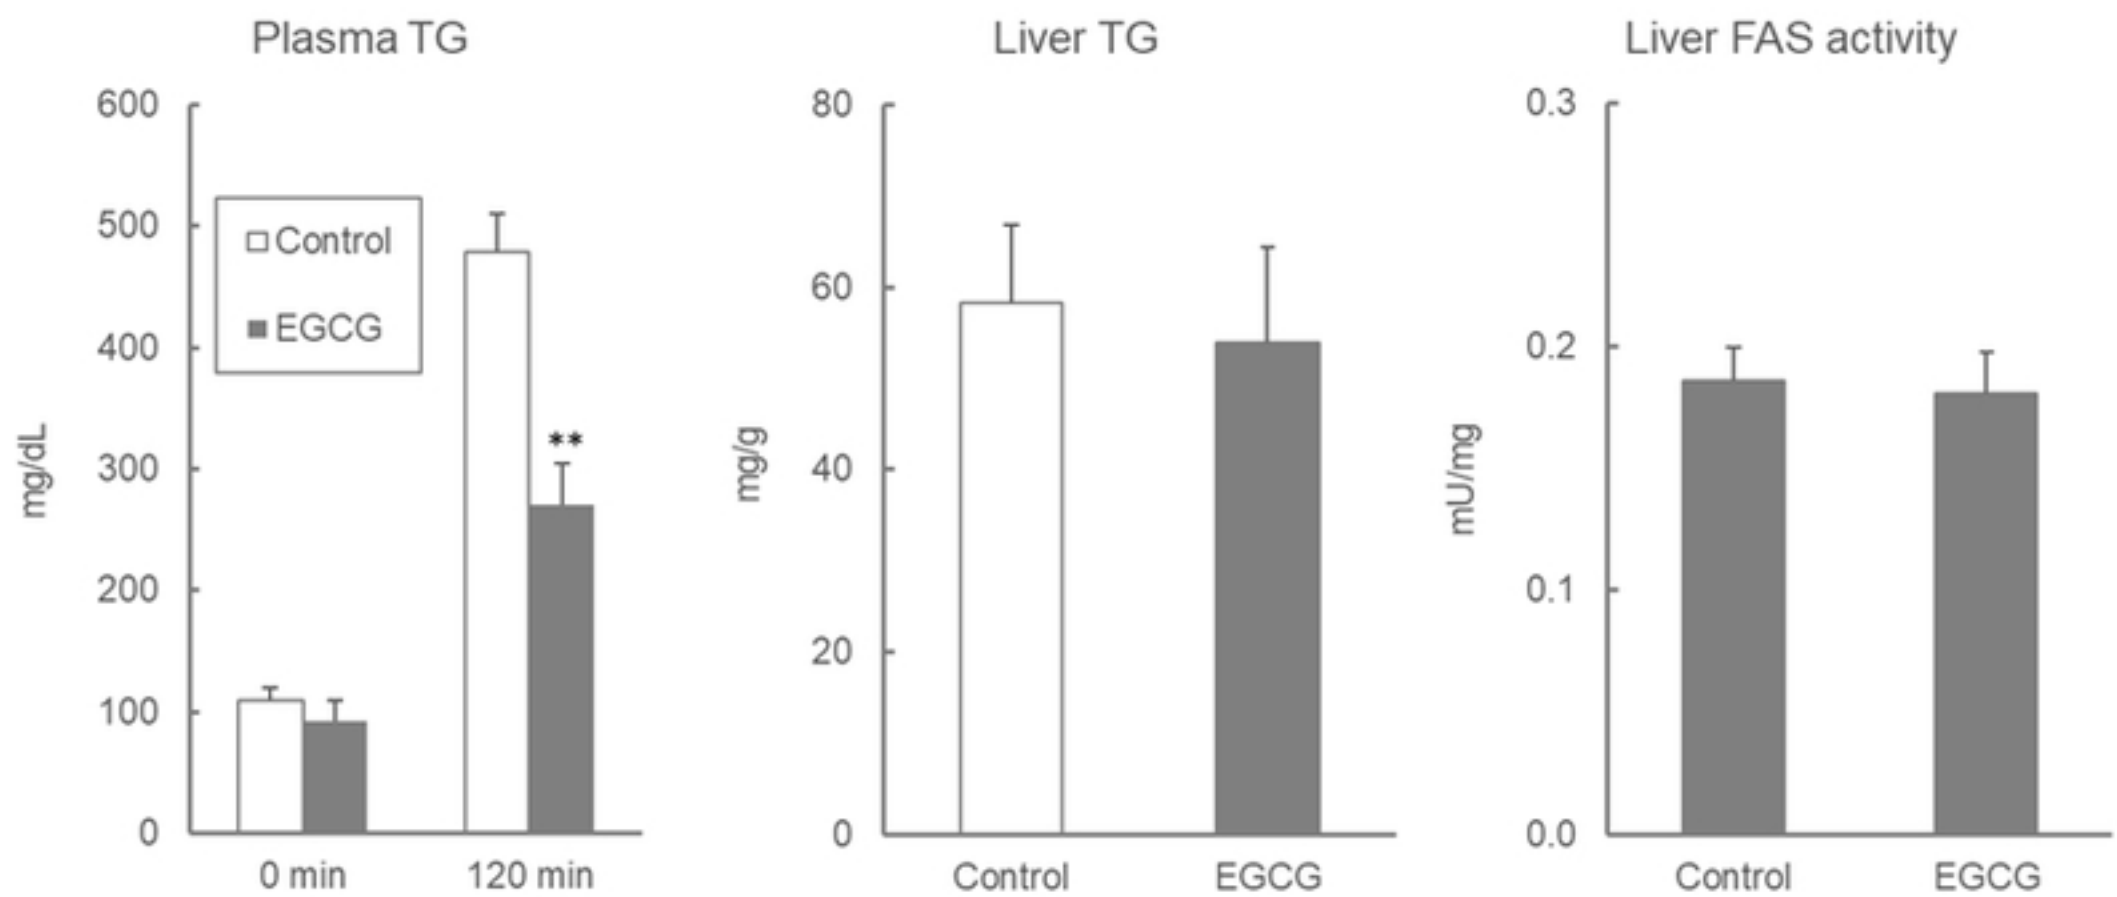

Figure 8

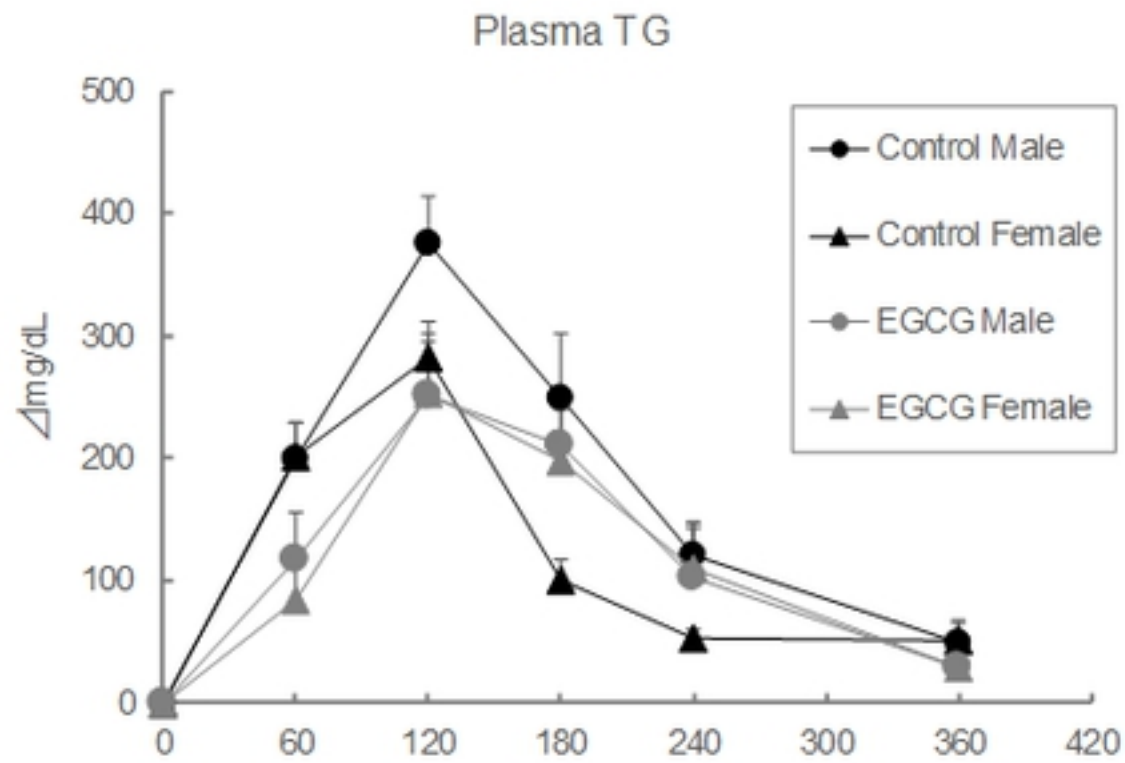

ANOVA

|                      | 60         | 120                | 180                | 240 | 360 |
|----------------------|------------|--------------------|--------------------|-----|-----|
| Gender               | NS         | NS                 | NS ( $p < 0.1$ )   | NS  | NS  |
| EGCG                 | $p < 0.01$ | N.S. ( $p < 0.1$ ) | NS                 | NS  | NS  |
| Gender $\times$ EGCG | NS         | NS                 | N.S. ( $p < 0.1$ ) | NS  | NS  |

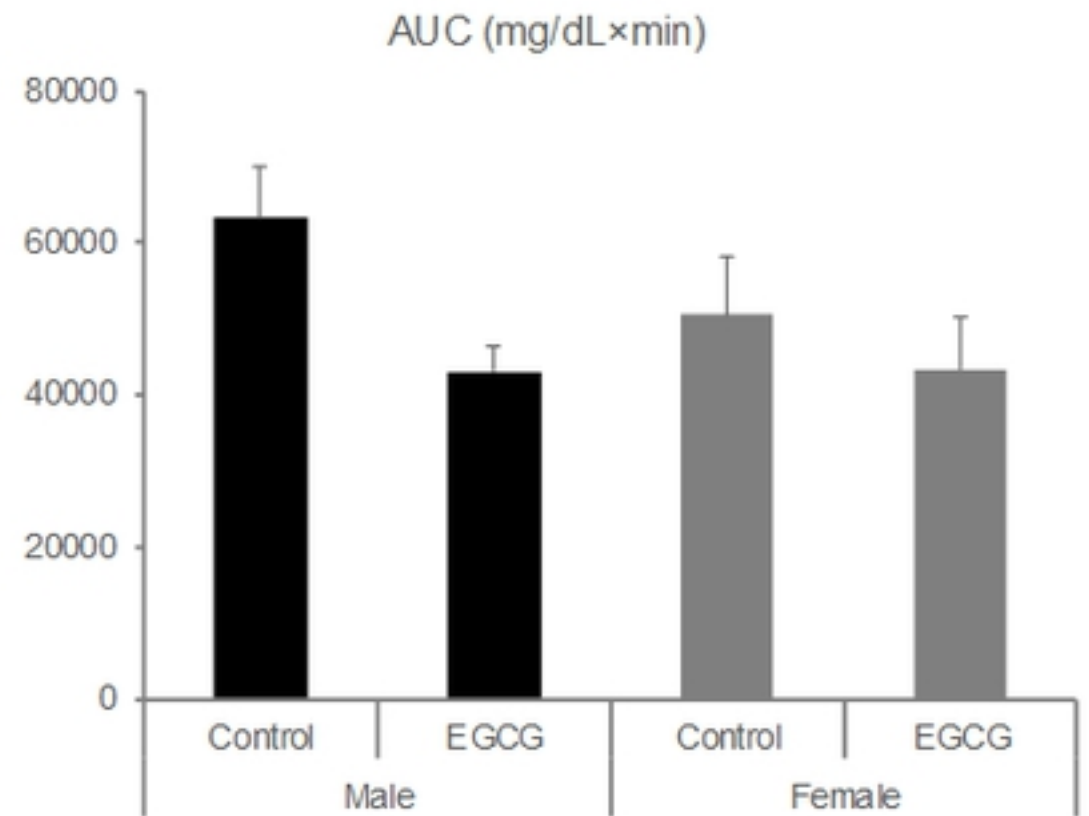

ANOVA

|                      |            |
|----------------------|------------|
| Gender               | $p < 0.05$ |
| EGCG                 | NS         |
| Gender $\times$ EGCG | NS         |

Figure 9

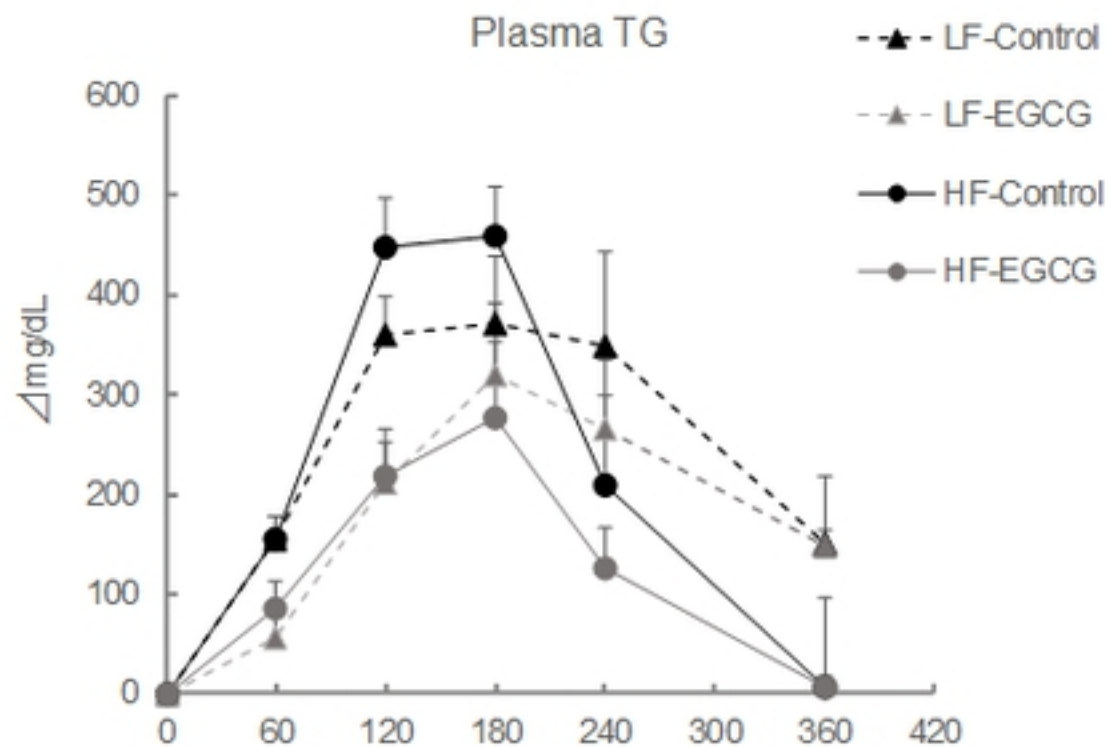

| ANOVA            |            |             |                    |                    |            |
|------------------|------------|-------------|--------------------|--------------------|------------|
|                  | 60         | 120         | 180                | 240                | 360        |
| HF               | N.S.       | N.S.        | N.S.               | N.S. ( $p < 0.1$ ) | $p < 0.05$ |
| EGCG             | $p < 0.01$ | $p < 0.001$ | N.S. ( $p < 0.1$ ) | N.S.               | N.S.       |
| HF $\times$ EGCG | N.S.       | N.S.        | N.S.               | N.S.               | N.S.       |

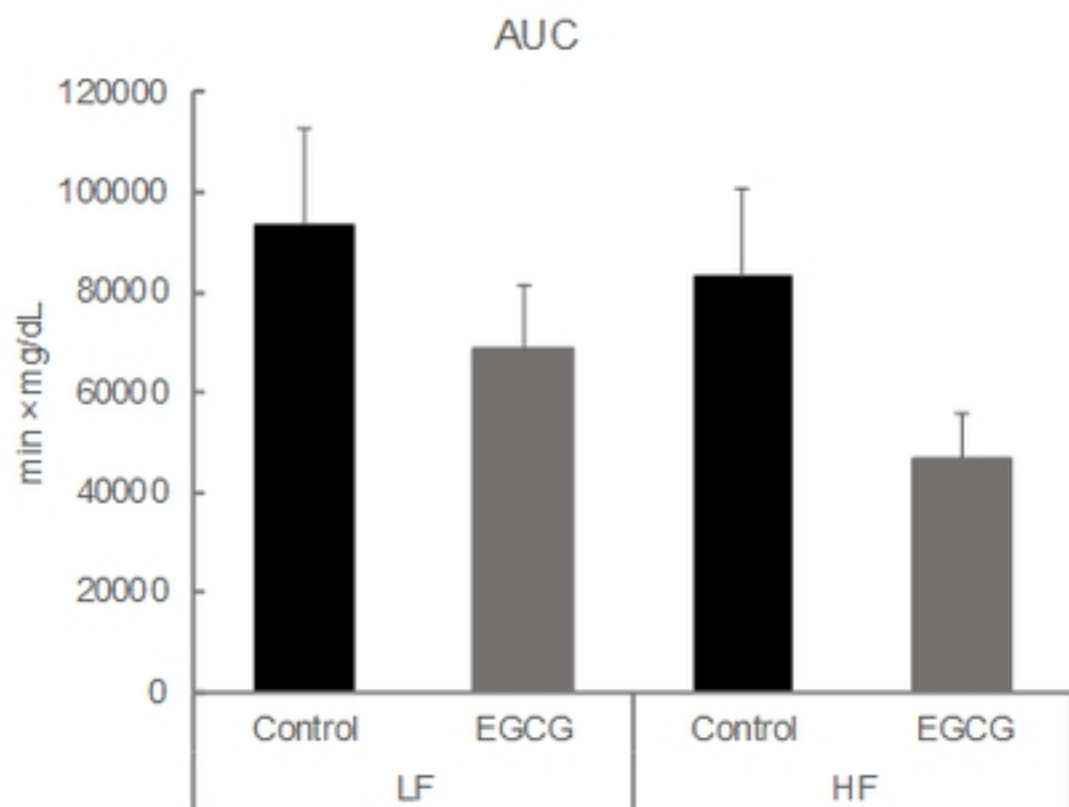

| ANOVA            |                    |
|------------------|--------------------|
|                  |                    |
| HF               | N.S.               |
| EGCG             | N.S. ( $p < 0.1$ ) |
| HF $\times$ EGCG | N.S.               |

Figure 10
